# Supplementary material for: Synthesis of the first Zn6-hexagon sandwich-tungstoantimonate via rearrangement of a non-lacunary Krebs-type polyoxotungstate
Source: PubMed Central journal article supplement (PMC6256361; doi:10.1039/c8dt02787k), 2018-10-11
Supplement: DT-047-C8DT02787K-s001.pdf [file DT-047-C8DT02787K-s001.pdf]

## ELECTRONIC SUPPLEMENTARY INFORMATION

### **Synthesis of the first $Zn_6$ -hexagon sandwich-tungstoantimonate via rearrangement of a non-lacunary Krebs-type polyoxotungstate**

Elias Tanuhadi<sup>†</sup>, Alexander Roller<sup>‡</sup>, Gerald Giester<sup>§</sup>, Ioannis Kampatsikas<sup>†</sup> and Annette Rompel<sup>\*,†</sup>

\*correspondence to [annette.rompel@univie.ac.at](mailto:annette.rompel@univie.ac.at)

<sup>†</sup>Universität Wien, Fakultät für Chemie, Institut für Biophysikalische Chemie, Althanstraße 14, 1090 Wien, Austria. [www.bpc.univie.ac.at](http://www.bpc.univie.ac.at)

<sup>‡</sup>Universität Wien, Fakultät für Chemie, Zentrum für Röntgenstrukturanalyse, Währinger Straße 42, 1090 Wien, Austria.

<sup>§</sup> Universität Wien, Fakultät für Geowissenschaften, Geographie und Astronomie, Institut für Mineralogie und Kristallographie, Althanstraße 14, 1090 Wien, Austria

# Content

|                                                                                                                                                                                              |    |
|----------------------------------------------------------------------------------------------------------------------------------------------------------------------------------------------|----|
| <b>1. General Information</b> .....                                                                                                                                                          | 3  |
| <b>2. Experimental Procedure</b> .....                                                                                                                                                       | 5  |
| 2.1. Preparation of $(C_{12}N_4H_{11})_4K_4[(Mn(H_2O)_3)_2(Mn_{0.5}W_{0.5}O_{0.5})_2(B-\beta-SbW_9O_{33})_2]$ ([Mn- $\beta$ -SbW <sub>9</sub> ]) .....                                       | 5  |
| 2.2. Preparation of $(C_{12}N_4H_{11})_4Na_5[(Zn_{0.8}W_{0.2}(H_2O)_3)_2(Zn_{0.2}W_{0.8}O_2)_2(B-\beta-SbW_9O_{33})_2]$ ([Zn/W] <sub>2</sub> - $\beta$ -SbW <sub>9</sub> ) ( <b>2</b> )..... | 5  |
| 2.3. Preparation of $[(Zn(H_2O))_6(B-\alpha-SbW_9O_{33})_2]^{6-}$ ([Zn <sub>6</sub> - $\alpha$ -SbW <sub>9</sub> )] ( <b>1</b> ) .....                                                       | 5  |
| 2.4. Preparation of $(TMA)_2Na_6H_8[(Mn(H_2O)_3)_2(CdCl_{0.8}O_{1.2})_2(B-\beta-SbW_9O_{33})_2]$ [Cd <sub>2</sub> Mn <sub>2</sub> - $\beta$ -SbW <sub>9</sub> ] ( <b>3</b> ).....            | 6  |
| <b>3. IR-spectra</b> .....                                                                                                                                                                   | 7  |
| <b>4. Thermogravimetric Analysis</b> .....                                                                                                                                                   | 12 |
| <b>5. Single-Crystal X-ray Diffraction</b> .....                                                                                                                                             | 14 |
| <b>6. PXRD</b> .....                                                                                                                                                                         | 22 |
| <b>7. UV-vis Spectroscopy</b> .....                                                                                                                                                          | 25 |
| <b>8. ESI-Mass Spectrometry</b> .....                                                                                                                                                        | 26 |
| <b>9. POM-Protein Interactions</b> .....                                                                                                                                                     | 27 |
| <b>10. References</b> .....                                                                                                                                                                  | 33 |

# 1. General Information

All reagents and chemicals were of high-purity grade and were used as purchased without further purification.  $\text{Na}_9[\text{B}-\alpha\text{-SbW}_9\text{O}_{33}]$  was prepared according to the literature procedure reported by Bösing *et al.*<sup>1</sup>

*Attenuated total reflection Fourier-transform Infrared Spectroscopy:* All spectra were recorded on a Bruker Tensor 27 IR Spectrometer equipped with a single-reflection diamond-ATR unit. Frequencies are given in  $\text{cm}^{-1}$ , intensities denoted as w = weak, m = medium, s = strong.

*Thermogravimetric analysis:* TGA was performed on a Mettler SDTA851e Thermogravimetric Analyzer under nitrogen flow with a heating rate of  $5 \text{ K min}^{-1}$  in the region 298–1023 K.

*UV-Vis spectroscopy:* UV-Vis spectra were collected on a Shimadzu UV 1800 spectrophotometer. The spectra were recorded in 50 % (v/v) DMSO solution.

*Electrospray Ionization Mass Spectrometry:* The title compound  $[\text{Zn}_6-\alpha\text{-SbW}_9]$  (**1**) was investigated with an ESI-Qq-oaRTOF supplied by Bruker Daltonics Ltd. at the Massenspektrometriezentrum, University of Vienna. Bruker Daltonics Data Analysis software was used to analyze the results. The analysis was carried out in 1:1 mixture of water/ACN, collected in negative ion mode and with the spectrometer calibrated with the standard tune-mix to give a precision of ca. 5 ppm in the region of  $m/z$  300–3000.

*Elemental analysis:* Elemental analysis was performed at the Institute of Chemical Technologies and Analytics, Technische Universität Wien.

An iCAP 6500 series ICP-OES spectrometer (Thermo Scientific, USA) has been used for simultaneous multielement analysis. The ICP-OES was equipped with a standard sample introduction system consisting of a concentric nebulizer and a cyclonic spray chamber. Transportation of sample solutions was performed by the peristaltic pump of the iCAP 6500 coupled to an ASX-520 auto sampler (Cetac, USA). The conditions used for determination of background corrected emission signals are presented in Table 1. Per element two sensitive and non interfered emission lines were used, the first line for measurement, the second line for quality control.

**Table S1:** Instrumental parameters and analytical wavelengths [nm]

| Parameter            | Value                               | Parameter      | Value                    |
|----------------------|-------------------------------------|----------------|--------------------------|
| Rf power             | 1200 W                              | Nebulizer flow | $0.8 \text{ l min}^{-1}$ |
| Sample flow          | $0.80 \text{ ml min}^{-1}$          | Auxiliary flow | $1.0 \text{ l min}^{-1}$ |
| Read delay           | 70 s                                | Coolant flow   | $15 \text{ l min}^{-1}$  |
| Observation height   | 12 mm                               |                |                          |
| Integration time     | 10 s                                |                |                          |
| Number of replicates | 5                                   |                |                          |
| Background           | constant shift from analytical line |                |                          |

| Element | Wavelength I [nm] | Wavelength II [nm] |
|---------|-------------------|--------------------|
| Mn      | 257.610           | 259.373            |
| Sb      | 206.833           | 231.147            |
| W       | 239.709           | 209.475            |
| Zn      | 213.856           | 202.548            |
| In      | 230.606           |                    |

Prior to ICP-OES measurement clear sample solutions were diluted 1:10 with 1%-HNO<sub>3</sub> (vol/vol), thereby Indium with a concentration level of 5 mg/L has been added as an internal standard to all sample solutions. Blank solutions were prepared in the same manner with the use of high purity water instead of sample solution. Quantification of derived emission signals was based on an external calibration function determined with aqueous standard solutions using Indium as internal standard.

### Chemicals and Reagents

All reagents and standard solutions used for the determination of the investigated elements were of adequate quality. High purity water was obtained by purifying de-ionized water (reverse osmosis/ion exchange combination Euro 20 plus, SG Water Systems, Germany) with an Easypure 2 system (Thermo Barnstead, USA). Nitric acid was of p.a. grade purity (Merck, Darmstadt, Germany). A certified stock solution of Indium (TraceCert ICP standard) was purchased from Fluka (Germany). Certified stock solutions (1000 mg L<sup>-1</sup>) of Mn, Sb, W and Zn were procured from Merck (Darmstadt, Germany) and used for the preparation of calibration standards. Appropriate working solutions were prepared by dilution of the stock solutions with 1.0 % nitric acid (v/v) just before use.

*SDS-PAGE* was performed according to a previously published procedure<sup>2</sup> using Precision Plus Protein Standard Dual Color (Bio-Rad) as molecular weight marker. Samples were applied to 14 % polyacrylamide gels mixed with reduced loading dye. Sample load onto the gel was 5 µg. Gels were stained with Coomassie Brilliant Blue. Imaging of the gels was applied with Gel Doc™ XR of BIO-RAD.

Tryptophan fluorescence spectroscopy: [Mn-β-SbW<sub>9</sub>], [(Zn/W)<sub>2</sub>-β-SbW<sub>9</sub>], (2), [Zn<sub>6</sub>-α-SbW<sub>9</sub>] (1) and [Cd<sub>2</sub>Mn<sub>2</sub>-β-SbW<sub>9</sub>] (3) were recorded on a Infinite 200 microplate reader using Nunclon 96 Flat Bottom Black Polysterol plates. The range of the emission wavelength was between 290 and 450 nm. The absorbance from the POMs was deducted from raw quenching data by applying equation 1.

$$F_{corr} = F_{obs} * antilog\left(\frac{0.605 * (OD_{ex} + OD_{em})}{2}\right) \quad (1)$$

where  $F_{corr}$  and  $F_{obs}$  are the fluorescence intensities after and before correcting inner filter effects, respectively,  $OD_{ex}$  the optical density at the excitation wavelength and  $OD_{em}$  the optical density at emission wavelength.

The further evaluation of the results was done with a derived Stern-Volmer equation **2**<sup>3</sup>.

$$\log \left[ \frac{F_0 - F_{corr}}{F_{corr}} \right] = \log K_q + n * \log [Q] \quad (2)$$

where  $F_0$  and  $F_{corr}$  are the fluorescence intensities in the absence and presence of the quencher, respectively,  $K_q$  the quenching rate constant of the protein,  $n$  the number of bound molecules and  $[Q]$  the concentration of the quencher.

## 2. Experimental Procedure

### 2.1. Preparation of $(C_{12}N_4H_{11})_4K_4[(Mn(H_2O)_3)_2(Mn_{0.5}W_{0.5}O_{0.5})_2(B-\beta-SbW_9O_{33})_2]$ ( $[Mn-\beta-SbW_9]$ )

To a stirred solution of  $Na_9[B-\alpha-SbW_9O_{33}]$  (1.07g, 0.35 mmol) in aqueous sodium acetate buffer (100 ml, pH 4.8, NaOAc/AcOH 0.5 M), manganese chloride  $MnCl_2 \cdot 4 H_2O$  (29.69 mg, 0.15 mmol) was added. The resulting yellow reaction mixture was stirred at 70 °C for 10 minutes. Ortho-phenylenediamine (540.7 mg, 5 mmol) was added to the reaction solution and the mixture was stirred for further 3 h at 85 °C. A significant change from yellow to dark orange over the time period of 3 h was noticed. KCl (10 ml, 0.5 M) was added dropwise to the hot reaction mixture. Dark red crystal plates of  $[Mn-\beta-SbW_9]$  were obtained upon cooling the reaction mixture to room temperature and further evaporation at 18°C gave a total yield of 80% based on W of the compound after 3 days.

### 2.2. Preparation of $(C_{12}N_4H_{11})_4Na_5[(Zn_{0.8}W_{0.2}(H_2O)_3)_2(Zn_{0.2}W_{0.8}O_2)_2(B-\beta-SbW_9O_{33})_2]$ ( $[(Zn/W)_2-\beta-SbW_9]$ ) (2)

$Na_9[B-\alpha-SbW_9O_{33}]$  (1.07 g, 0.35 mmol) and  $ZnCl_2$  (204.45 mg, 1.5 mmol) were dissolved in sodium acetate buffer (100 ml, pH 4.8, NaOAc/AcOH 0.5 M). The resulting reaction mixture was refluxed at 80 °C for 30 min. To the colorless solution, *o*-phenylenediamine (216.28 mg, 2 mmol) was added. The mixture was stirred for 1.5 h at 85 °C. A color change from colorless to yellow was observed. After 1.5 h,  $FeCl_3$  (32.4 mg, 0.2 mmol) was added and the solution was refluxed at 90 °C for further 1.5 h. A dark orange reaction mixture was obtained. The solution was filtered and cooled to room temperature. Evaporation at 18 °C gave dark red crystal plates of  $[(Zn/W)_2-\beta-SbW_9]$  (2) after 3 days (yield 70 % based on W). Elem. anal. Calcd (found): Zn, 2.0 (2.4); Sb, 3.7 (4.1); W, 55.6 (55.5).

### 2.3. Preparation of $[(Zn(H_2O))_6(B-\alpha-SbW_9O_{33})_2]^{6-}$ ( $[Zn_6-\alpha-SbW_9]$ ) (1)

$[Mn-\beta-SbW_9]$  (193 mg, 0.034 mmol) was dissolved in 15 ml of acetonitrile/water mixture (1:4). The pH of the resulting solution was adjusted to 6.8 by dropwise addition of 0.1 M NaOH.  $ZnCl_2$  (29.8 mg, 0.218 mmol) was added and the reaction mixture was heated to 80 °C for 2

h. A solution of tetramethylammonium chloride (TMACl) (3 ml, [0.4 M]) was added dropwise to the hot reaction mixture, which was filtered after cooling to room temperature. Evaporation of the resulting light yellowish solution at 18°C gave a mixture of block shaped colorless crystals of  $(\text{TMA})_6[(\text{Zn}(\text{H}_2\text{O}))_6(\text{B-}\alpha\text{-SbW}_9\text{O}_{33})_2]$  ( $(\text{TMA})_6[\text{Zn}_6\text{-}\alpha\text{-SbW}_9]$ ) ((yield 24 % based on W) Elem. anal. Calcd (found): Zn, 6.5 (7.2); Sb, 4.0 (4.0); W, 54.4 (54.7) and red crystal plates of  $(\text{TMA})(\text{C}_{12}\text{N}_4\text{H}_{11})_5[(\text{Zn}(\text{H}_2\text{O}))_6(\text{B-}\alpha\text{-SbW}_9\text{O}_{33})_2]$  ( $(\text{TMA})(\text{C}_{12}\text{N}_4\text{H}_{11})_5[\text{Zn}_6\text{-}\alpha\text{-SbW}_9]$ ) (yield 10 % based on W) after one week.

**2.4.** Preparation of  $(\text{TMA})_2\text{Na}_6\text{H}_8[(\text{Mn}(\text{H}_2\text{O})_3)_2(\text{CdCl}_{0.8}\text{O}_{1.2})_2(\text{B-}\beta\text{-SbW}_9\text{O}_{33})_2]$  [ $\text{Cd}_2\text{Mn}_2\text{-}\beta\text{-SbW}_9$ ] (**3**)

[Mn- $\beta$ -SbW<sub>9</sub>] (193 mg, 0.034 mmol) and CdCl<sub>2</sub> (39.96 mg, 0.218 mmol) were dissolved in sodium acetate buffer (15 ml, pH 5.5, NaOAc/AcOH 0.5 M). The reaction mixture was heated to 80 °C for 2 h. A solution of tetra-methylammonium chloride (TMACl) (3 ml, [0.4 M]) was added dropwise to the hot reaction mixture, which was filtered after cooling to room temperature. Evaporation of the resulting orange solution at 18°C gave dark yellow block shaped crystals of  $(\text{TMA})_2\text{Na}_6\text{H}_8[(\text{Mn}(\text{H}_2\text{O})_3)_2(\text{CdCl}_{0.8}\text{O}_{1.2})_2(\text{B-}\beta\text{-SbW}_9\text{O}_{33})_2]$  [ $\beta\text{-Cd}_2\text{Mn}_2\text{SbW}_9$ ] (**3**) ((yield 51 % based on W) after one week. Calcd (found): Mn, 1.3 (1.9); Cd, 3.7 (3.3); Sb, 3.9 (3.5); W, 53.8 (51.4).

### 3. IR-spectra

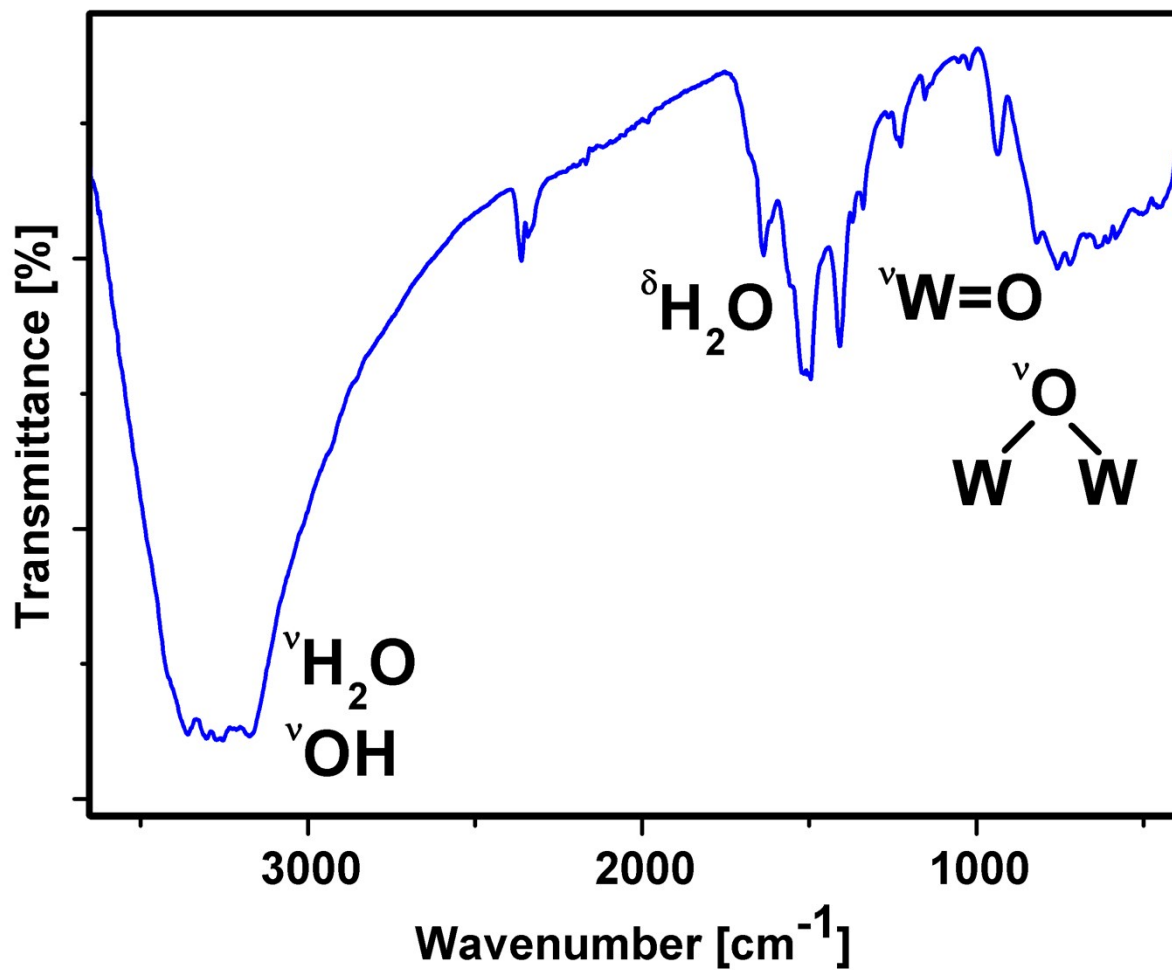

**Figure S1:** IR-spectrum of  $(\text{C}_{12}\text{N}_4\text{H}_{11})_4\text{K}_4[(\text{Mn}(\text{H}_2\text{O})_3)_2(\text{Mn}_{0.5}\text{W}_{0.5}\text{O}_{0.5})_2(\text{B-}\beta\text{-SbW}_9\text{O}_{33})_2]$  [ $\text{Mn-}\beta\text{-SbW}_9$ ] (ATR-IR,  $\text{cm}^{-1}$ ): 3364.4 (s), 3263.6 (s), 2359.4 (w), 1637.8 (w), 1508.1 (m), 1401.6 (m), 1234.6 (m), 1151.6 (w), 936.4 (w), 748.5 (m).

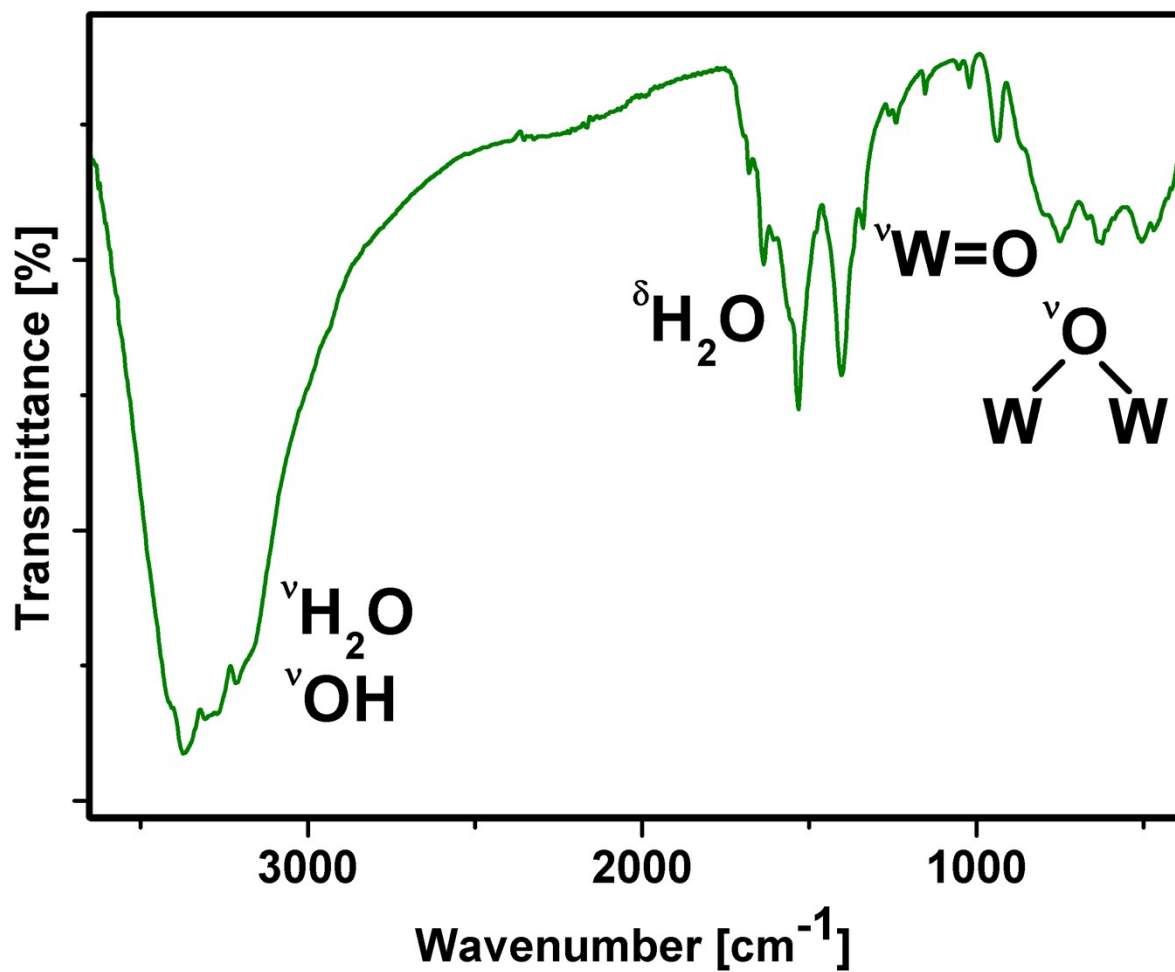

**Figure S2:** IR-spectrum of  $(C_{12}N_4H_{11})_4Na_5[(Zn_{0.8}W_{0.2}(H_2O)_3)_2(Zn_{0.2}W_{0.8}O_2)_2(B-\beta-SbW_9O_{33})_2][Zn/W)_2-\beta-SbW_9]$  (**2**) (ATR-IR, cm<sup>-1</sup>): 3364.2 (s), 3206.7 (s), 1634.9 (m), 1530.3 (m), 1394.5 (m), 1326.9 (w), 1243.9 (w), 1153.9 (w), 1019.0 (w), 935.9 (w), 748.3 (w), 628.0 (w), 507.8 (w).



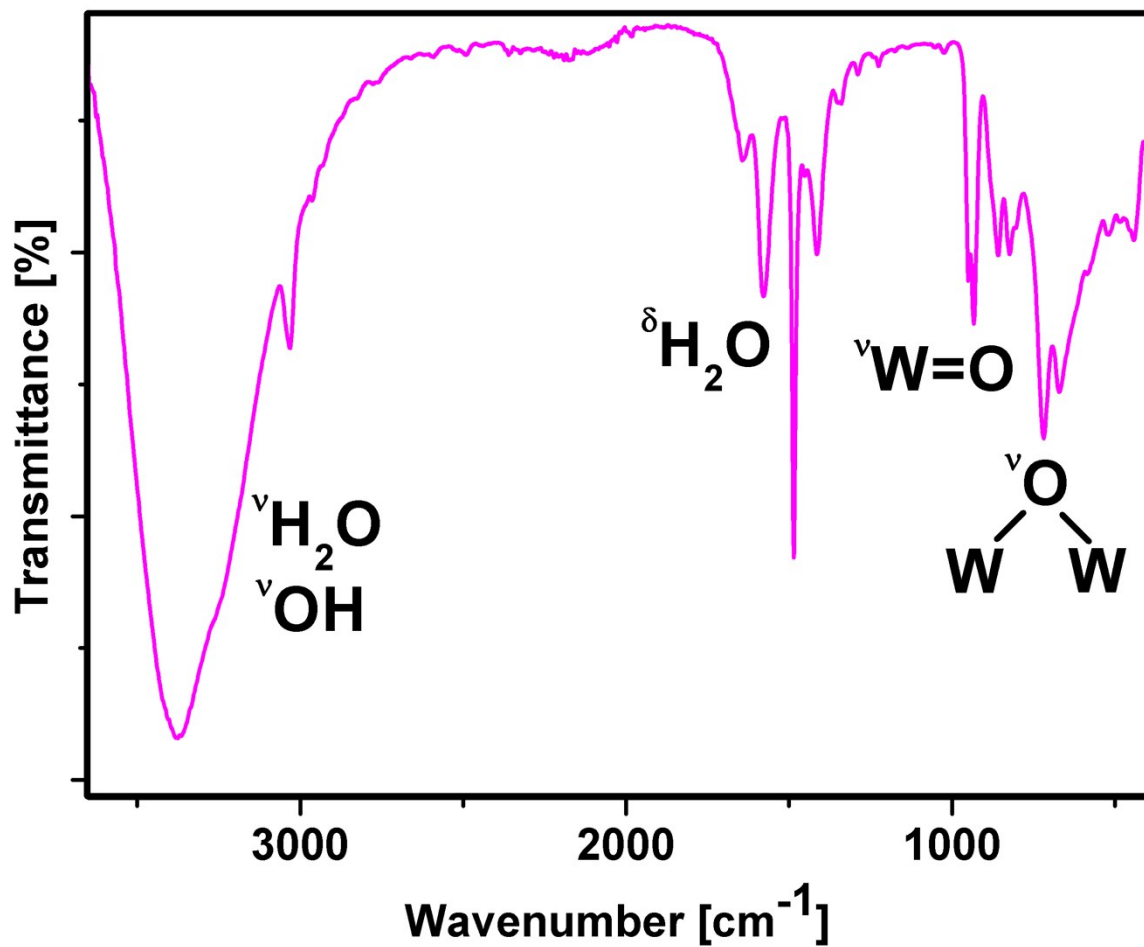

**Figure S3:** IR-spectrum of  $(\text{TMA})(\text{C}_{12}\text{N}_4\text{H}_{11})_5[(\text{Zn}(\text{H}_2\text{O})_6)(\text{B}-\alpha\text{-SbW}_9\text{O}_{33})_2]$   
 $(\text{TMA})(\text{C}_{12}\text{N}_4\text{H}_{11})_5[\text{Zn}_6\text{-}\alpha\text{-SbW}_9]$  (**1**) (ATR-IR,  $\text{cm}^{-1}$ ): 3364.8 (s), 3028 (m), 1637.4 (w), 1571.9 (m), 1485.1 (s), 1413.7 (m), 931.6 (m), 856.3 (w), 819.7 (w), 721.3 (m), 673.1 (m), 437.8 (w), 387.7 (w). TMA = tetra-methylammonium

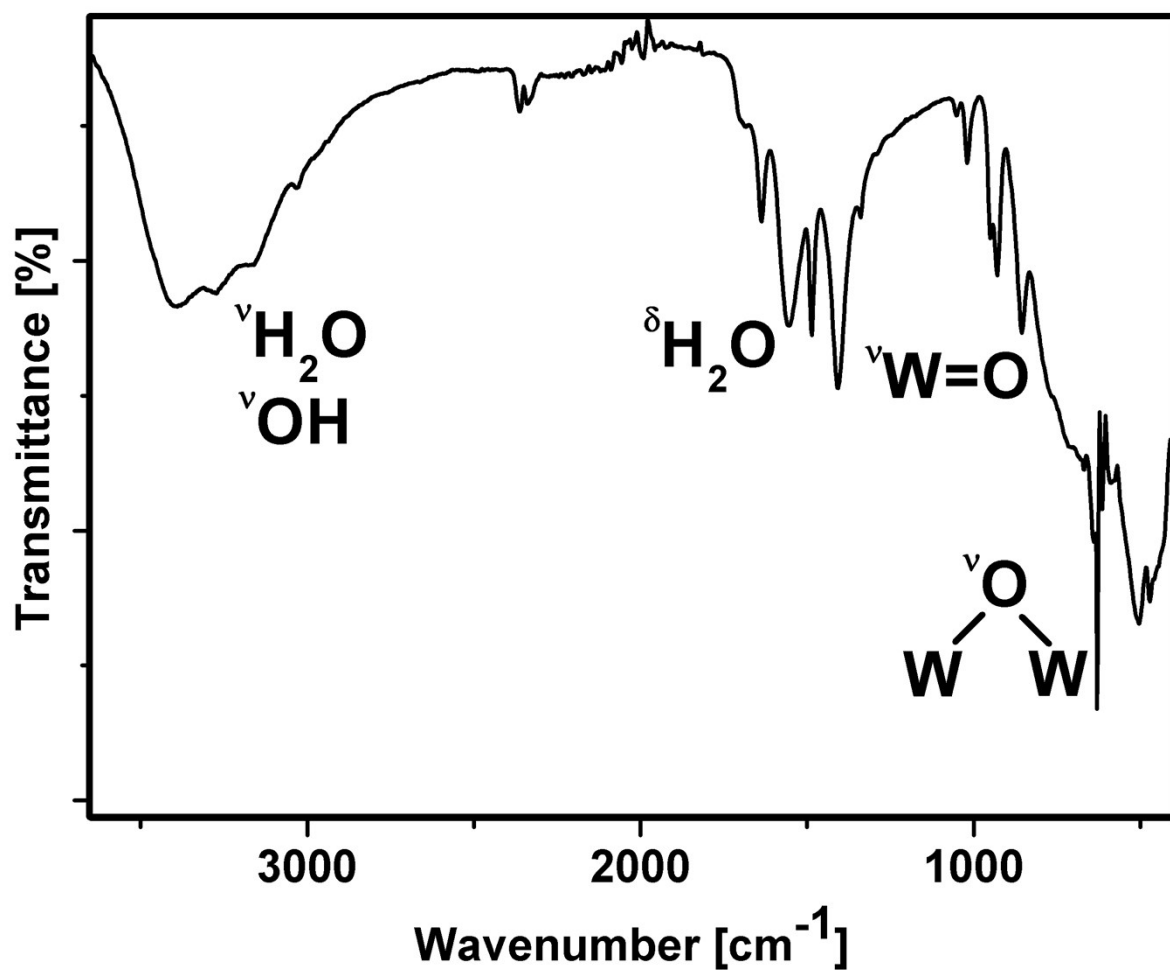

**Figure S4:** IR-spectrum of  $(\text{TMA})_6[(\text{Zn}(\text{H}_2\text{O}))_6(\text{B-}\alpha\text{-SbW}_9\text{O}_{33})_2]$   $(\text{TMA})_6[\text{Zn}_6\text{-}\alpha\text{-SbW}_9]$  (**1**) (ATR-IR,  $\text{cm}^{-1}$ ): 3365.5 (w), 3031.78 (w), 1579.53 (m), 1486.1 (m), 1413.9 (m), 1342.31 (w), 931.9 (s), 856.5 (m), 821.59 (m), 713.6 (m), 673.1 (m), 437.9 (w), 388.4 (w). TMA = tetramethylammonium

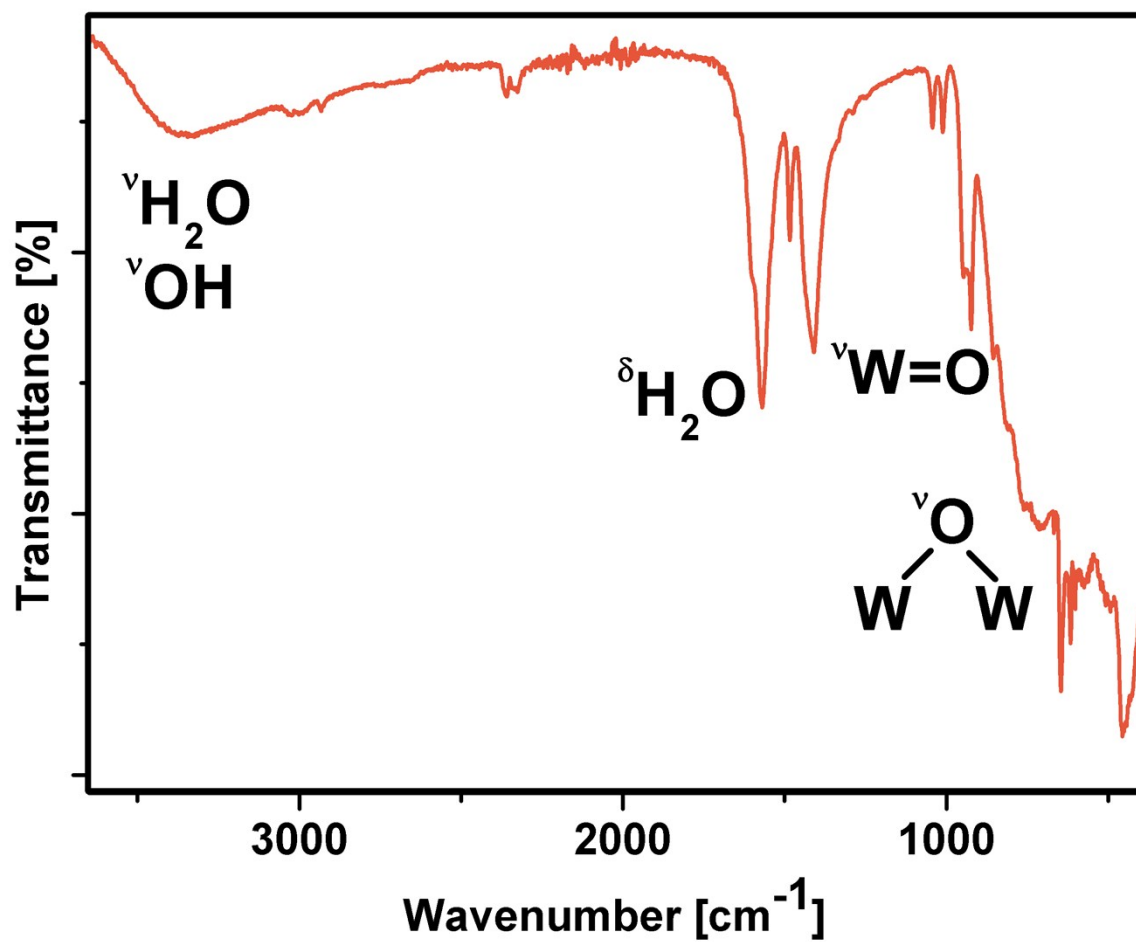

**Figure S5:** IR-spectrum of  $[\text{Cd}_2\text{Mn}_2\text{-}\beta\text{-SbW}_9]$  (**3**) (ATR-IR,  $\text{cm}^{-1}$ ): 3365.8 (s), 3026 (m), 1637.4 (w), 1569.9 (m), 1483.1 (s), 1412.5 (m), 930.4 (m), 855.0 (w), 820.0 (w), 720.9 (m), 672.0 (m), 435.9 (w), 386.9 (w).

## 4. Thermogravimetric Analysis

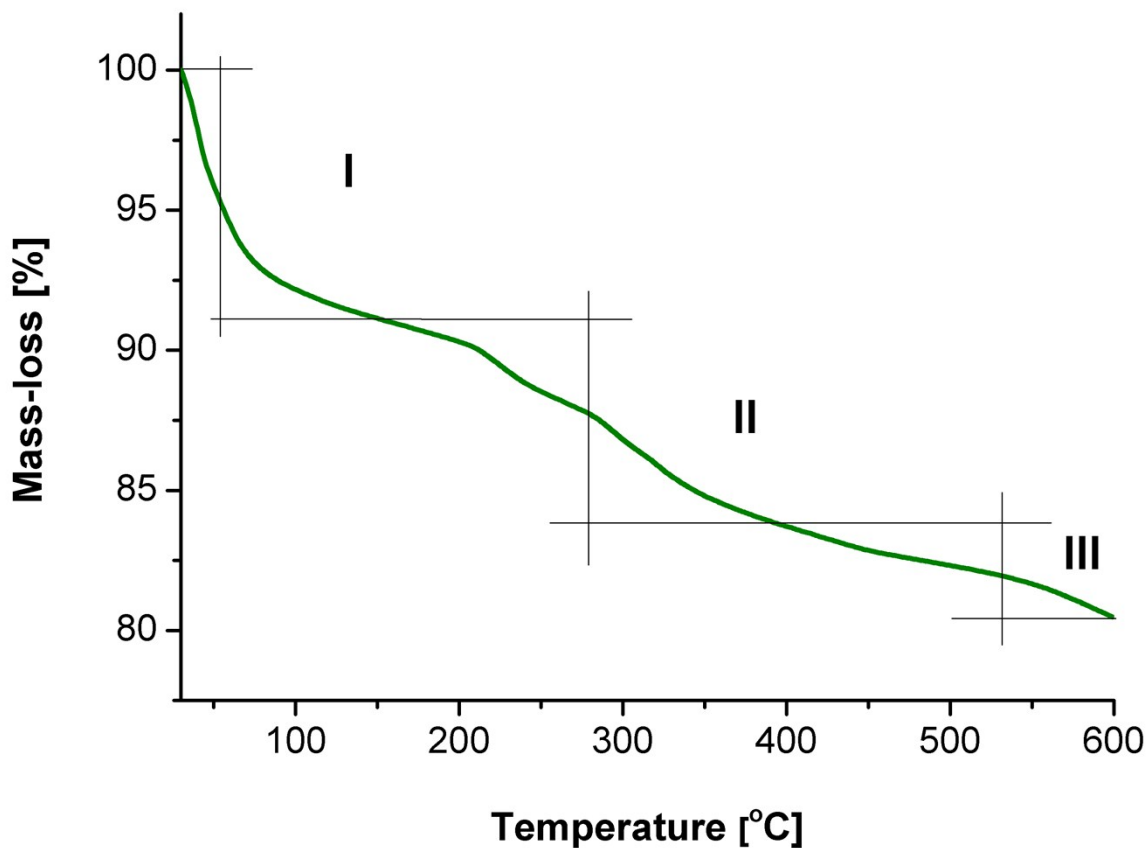

**Figure S6:** Thermogravimetric curve of  $(C_{12}N_4H_{11})_4Na_5[(Zn_{0.8}W_{0.2}(H_2O)_3)_2(Zn_{0.2}W_{0.8}O_2)_2](B-\beta-SbW_9O_{33})_2 \cdot 13 H_2O$  (**2**); DAP = 2, 3 - diaminophenazine

**Table S2:** TGA results for compound  $(C_{12}N_4H_{11})_4Na_5[(Zn_{0.8}W_{0.2}(H_2O)_3)_2(Zn_{0.2}W_{0.8}O_2)_2](B-\beta-SbW_9O_{33})_2 \cdot 13 H_2O$  (**2**); DAP = 2, 3 - diaminophenazine

| Step | Temperatur/°C  | Mass-loss/% | Number of molecules corresponding to mass-loss |
|------|----------------|-------------|------------------------------------------------|
| I    | <b>30-157</b>  | <b>8.97</b> | <b>12.74 H<sub>2</sub>O+1.71 DAP</b>           |
| II   | <b>157-402</b> | <b>7.32</b> | <b>2.28 DAP</b>                                |
| III  | <b>402-600</b> | <b>1.5</b>  | <b>5.5 H<sub>2</sub>O</b>                      |

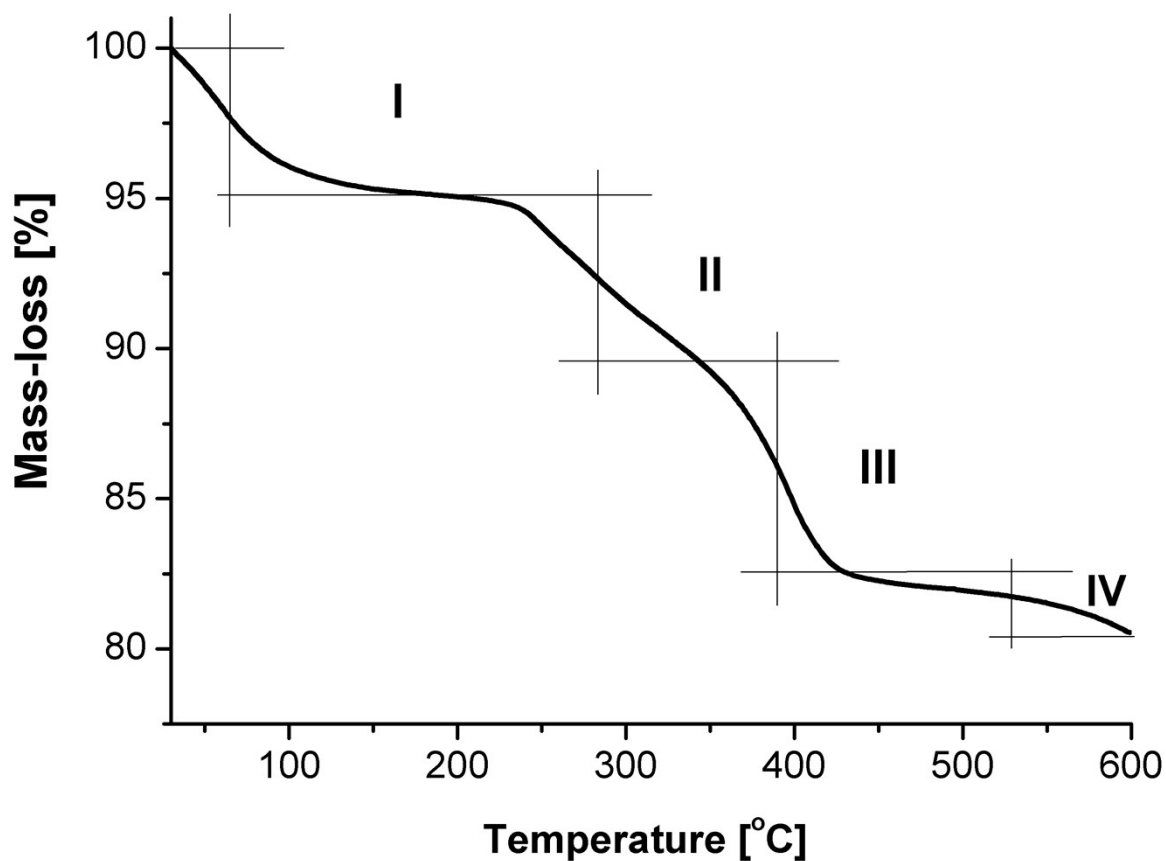

**Figure S7:** Thermogravimetric curve of  $(\text{TMA})_6[(\text{Zn}(\text{H}_2\text{O}))_6(\text{B-}\alpha\text{-SbW}_9\text{O}_{33})_2]\cdot 37.5 \text{ H}_2\text{O}$  (**1**); TMA = tetramethylammonium

**Table S3:** TGA results for compound  $(\text{TMA})_6[(\text{Zn}(\text{H}_2\text{O}))_6(\text{B-}\alpha\text{-SbW}_9\text{O}_{33})_2]\cdot 37.5 \text{ H}_2\text{O}$  (**1**); TMA = tetramethylammonium

| Step | Temperatur/°C  | Mass-loss/% | Number of molecules corresponding to mass-loss |
|------|----------------|-------------|------------------------------------------------|
| I    | <b>30-184</b>  | <b>4.81</b> | <b>16.87 H<sub>2</sub>O</b>                    |
| II   | <b>184-342</b> | <b>5.59</b> | <b>20.7 H<sub>2</sub>O</b>                     |
| III  | <b>342-428</b> | <b>7.04</b> | <b>6.0 TMA</b>                                 |
| IV   | <b>428-600</b> | <b>2.06</b> | <b>7.2 H<sub>2</sub>O</b>                      |

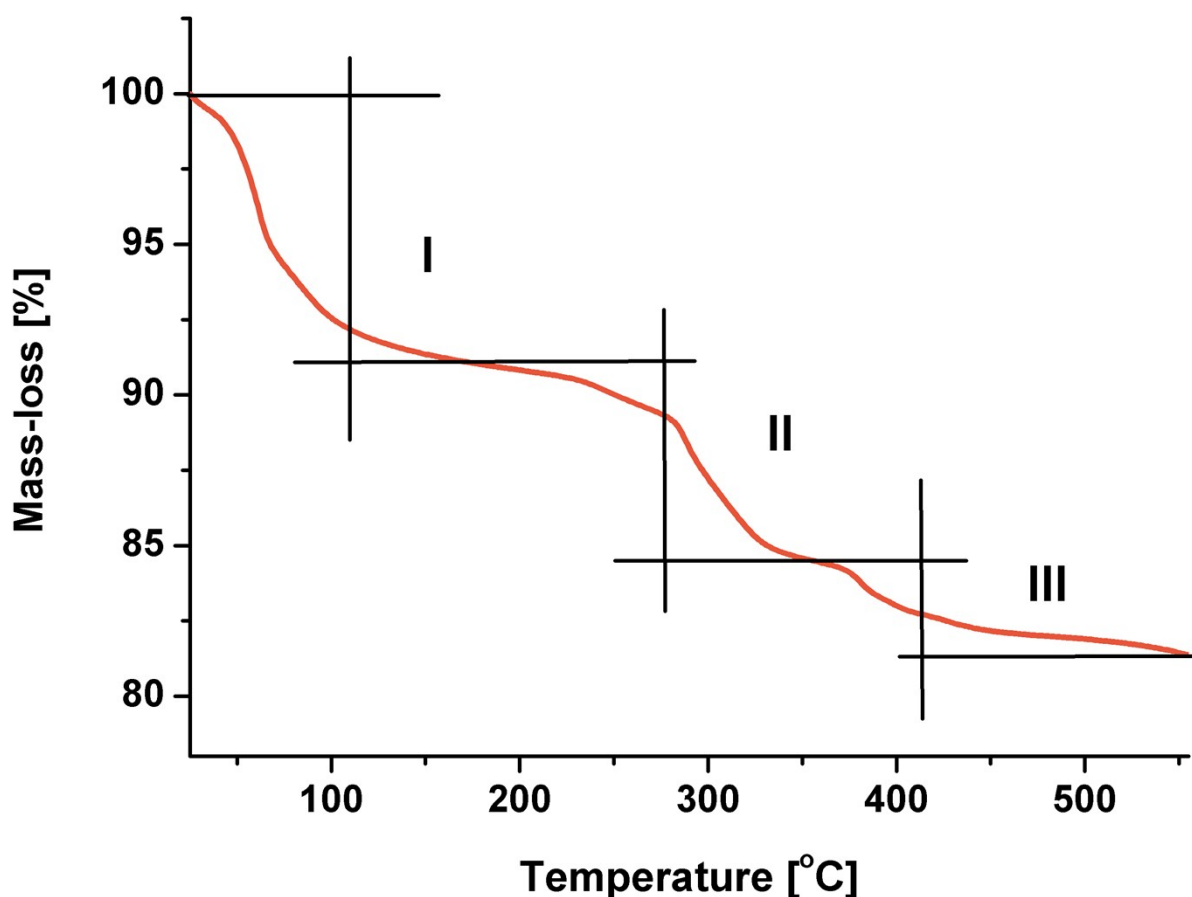

**Figure S8:** Thermogravimetric curve of  $(\text{TMA})_2\text{Na}_6\text{H}_8[(\text{Mn}(\text{H}_2\text{O})_3)_2(\text{CdCl}_{0.8}\text{O}_{1.2})_2(B\text{-}\beta\text{-SbW}_9\text{O}_{33})_2]\cdot 51.5 \text{H}_2\text{O}$  (**3**); TMA = tetramethylammonium

**Table S4:** TGA results for compound  $(\text{TMA})_2\text{Na}_6\text{H}_8[(\text{Mn}(\text{H}_2\text{O})_3)_2(\text{CdCl}_{0.8}\text{O}_{1.2})_2(B\text{-}\beta\text{-SbW}_9\text{O}_{33})_2]\cdot 51.5 \text{H}_2\text{O}$  (**3**); TMA = tetramethylammonium

| Step | Temperatur/°C | Mass-loss/% | Number of molecules corresponding to mass-loss |
|------|---------------|-------------|------------------------------------------------|
| I    | 25-175        | 8.94        | 31.6 H <sub>2</sub> O                          |
| II   | 175-350       | 6.48        | 14.73 H <sub>2</sub> O + 2 TMA                 |
| III  | 350-550       | 3.14        | 5.9 H <sub>2</sub> O + 4 Na                    |

## 5. Single-Crystal X-ray Diffraction

The X-ray intensity data were measured on Bruker X8 APEX2 equipped with multilayer monochromator and on Nonius Kappa CCD diffractometer equipped with a graphite monochromator, Mo K $\alpha$  INCOATEC micro focus sealed tube and Kryoflex cooling device. The structures were solved by direct methods and refined by full-matrix least-squares techniques. Non-hydrogen atoms were refined with anisotropic displacement parameters. Hydrogen atoms were inserted at calculated positions and refined with a riding model. The following software was used: Bruker SAINT software package<sup>4</sup> using a narrow-frame

algorithm for frame integration, OLEX2<sup>5</sup> for structure solution, refinement, molecular diagrams and graphical user-interface, Shelxle<sup>6</sup> for refinement and graphical user-interface SHELXS-2013<sup>7</sup> for structure solution, SHELXL-2013<sup>8</sup> for refinement. Experimental data and CCDC-Codes can be found in Table S1. Crystal data, data collection parameters, and structure refinement details are given in Tables S2-S9.

**Table S5:** Experimental parameter and CCDC-Code.

| Sample                                                                                                        | Machine      | Source | Temp.  | Detector Distance | Time/ Frame | #Frames | Frame width | CCDC    |
|---------------------------------------------------------------------------------------------------------------|--------------|--------|--------|-------------------|-------------|---------|-------------|---------|
|                                                                                                               |              |        | [K]    | [mm]              | [s]         |         | [°]         |         |
| [Mn-β-SbW <sub>9</sub> ]                                                                                      | Nonius Kappa | Mo     | 200    | 35                | 85          | 404     | 2           | 1569737 |
| [(Zn/W) <sub>2</sub> -β-SbW <sub>9</sub> ] (2)                                                                | Bruker X8    | Mo     | 200    | 40                | 80          | 623     | 2           | 1569739 |
| (TMA)(C <sub>12</sub> N <sub>4</sub> H <sub>11</sub> ) <sub>5</sub> Zn <sub>6</sub> -α-SbW <sub>9</sub> ] (1) | Bruker X8    | Mo     | 100    | 35                | 60          | 2131    | 0.4         | 1569738 |
| (TMA) <sub>6</sub> [Zn <sub>6</sub> -α-SbW <sub>9</sub> ] (1)                                                 | Bruker X8    | Mo     | 100    | 35                | 5           | 5947    | 0.5         | 1576366 |
| [Cd <sub>2</sub> Mn <sub>2</sub> -β-SbW <sub>9</sub> ] (3)                                                    | Bruker X8    | Mo     | 101.85 | 34                | 10          | 1215    | 0.5         | 1849600 |

**Table S6:** Sample and crystal data of (C<sub>12</sub>N<sub>4</sub>H<sub>11</sub>)<sub>4</sub>K<sub>4</sub>[(Mn(H<sub>2</sub>O)<sub>3</sub>)<sub>2</sub>(Mn<sub>0.5</sub>W<sub>0.5</sub>O<sub>0.5</sub>)<sub>2</sub>(B-β-SbW<sub>9</sub>O<sub>33</sub>)<sub>2</sub>] [Mn-β-SbW<sub>9</sub>]

|                                                  |                                                                                                                                    |                                                   |            |           |
|--------------------------------------------------|------------------------------------------------------------------------------------------------------------------------------------|---------------------------------------------------|------------|-----------|
| <b>Chemical formula</b>                          | C <sub>48</sub> H <sub>67.2</sub> K <sub>4</sub> Mn <sub>3</sub> N <sub>16</sub> O <sub>80.1</sub> Sb <sub>2</sub> W <sub>19</sub> | <b>Crystal system</b>                             | triclinic  |           |
| <b>Formula weight [g/mol]</b>                    | 6207.84                                                                                                                            | <b>Space group</b>                                | <i>P-1</i> |           |
| <b>Temperature [K]</b>                           | 200                                                                                                                                | <b>Z</b>                                          | 1          |           |
| <b>Measurement method</b>                        | \w scans                                                                                                                           | <b>Volume [Å<sup>3</sup>]</b>                     | 3477.6(14) |           |
| <b>Radiation (Wavelength [Å])</b>                | MoKα (λ = 0.71073)                                                                                                                 | <b>Unit cell dimensions [Å] and [°]</b>           | 12.116(2)  | 108.55(3) |
| <b>Crystal size / [mm<sup>3</sup>]</b>           | 0.05 × 0.05 × 0.05                                                                                                                 |                                                   | 14.374(3)  | 91.90(3)  |
| <b>Crystal habit</b>                             | clear dark red block                                                                                                               |                                                   | 21.414(4)  | 99.07(3)  |
| <b>Density (calculated) / [g/cm<sup>3</sup>]</b> | 2964                                                                                                                               | <b>Absorption coefficient / [mm<sup>-1</sup>]</b> | 16489      |           |
| <b>Abs. correction Tmin</b>                      | 0.5616                                                                                                                             | <b>Abs. correction Tmax</b>                       | 0.7536     |           |
| <b>Abs. correction type</b>                      | multi-scan                                                                                                                         | <b>F(000) [e<sup>-</sup>]</b>                     | 2767.0     |           |

**Table S7:** Data collection and structure refinement of  $(C_{12}N_4H_{11})_4K_4[(Mn(H_2O)_3)_2(Mn_{0.5}W_{0.5}O_{0.5})_2(B-\beta-SbW_9O_{33})_2] [Mn-\beta-SbW_9]$

|                                                       |                                                              |                                            |                                     |                           |
|-------------------------------------------------------|--------------------------------------------------------------|--------------------------------------------|-------------------------------------|---------------------------|
| <b>Index ranges</b>                                   | $-17 \leq h \leq 16, -20 \leq k \leq 20, -29 \leq l \leq 29$ | <b>Theta range for data collection [°]</b> | 4.15 to 60.128                      |                           |
| <b>Reflections number</b>                             | 37980                                                        | <b>Data / restraints / parameters</b>      | 20123/25/800                        |                           |
| <b>Refinement method</b>                              | Least squares                                                | <b>Final R indices</b>                     | all data                            | R1 = 0.1026, wR2 = 0.1451 |
| <b>Function minimized</b>                             | $\sum w(F_o^2 - F_c^2)^2$                                    |                                            | I > 2σ(I)                           | R1 = 0.0553, wR2 = 0.1289 |
| <b>Goodness-of-fit on F<sup>2</sup></b>               | 1017                                                         | <b>Weighting scheme</b>                    | $w=1/[\sigma^2(F_o^2)+(0.0702P)^2]$ |                           |
| <b>Largest diff. peak and hole [e Å<sup>-3</sup>]</b> | 3.18/-2.69                                                   |                                            | where $P=(F_o^2+2F_c^2)/3$          |                           |

**Table S8:** Sample and crystal data of  $(C_{12}N_4H_{11})_4Na_5[(Zn_{0.8}W_{0.2}(H_2O)_3)_2(Zn_{0.2}W_{0.8}O_2)_2(B-\beta-SbW_9O_{33})_2] [(Zn/W)_2-\beta-SbW_9] (2)$

|                                                  |                                                      |                                                   |             |            |
|--------------------------------------------------|------------------------------------------------------|---------------------------------------------------|-------------|------------|
| <b>Chemical formula</b>                          | $C_{48}H_{53}N_{16}Na_5O_{83}Sb_2W_{19.89}Zn_{2.11}$ | <b>Crystal system</b>                             | triclinic   |            |
| <b>Formula weight [g/mol]</b>                    | 6335.22                                              | <b>Space group</b>                                | <i>P-1</i>  |            |
| <b>Temperature [K]</b>                           | 200.0                                                | <b>Z</b>                                          | 1           |            |
| <b>Measurement method</b>                        | \w scans                                             | <b>Volume [Å<sup>3</sup>]</b>                     | 3303.7(3)   |            |
| <b>Radiation (Wavelength [Å])</b>                | MoKα (λ = 0.71073)                                   | <b>Unit cell dimensions [Å] and [°]</b>           | 12.6796(7)  | 92.665(3)  |
| <b>Crystal size / [mm<sup>3</sup>]</b>           | 0.125 × 0.05 × 0.01                                  |                                                   | 14.1057(7)  | 93.300(3)  |
| <b>Crystal habit</b>                             | clear red plate                                      |                                                   | 20.5025(11) | 115.147(3) |
| <b>Density (calculated) / [g/cm<sup>3</sup>]</b> | 3184                                                 | <b>Absorption coefficient / [mm<sup>-1</sup>]</b> | 18120       |            |
| <b>Abs. correction Tmin</b>                      | 0.4500                                               | <b>Abs. correction Tmax</b>                       | 0.7461      |            |
| <b>Abs. correction type</b>                      | multi-scan                                           | <b>F(000) [e<sup>-</sup>]</b>                     | 2809.0      |            |



**Table S9:** Data collection and structure refinement of  $(\text{C}_{12}\text{N}_4\text{H}_{11})_4\text{Na}_5[(\text{Zn}_{0.8}\text{W}_{0.2}(\text{H}_2\text{O})_3)_2(\text{Zn}_{0.2}\text{W}_{0.8}\text{O}_2)_2(\text{B}-\beta\text{-SbW}_9\text{O}_{33})_2][(\text{Zn}/\text{W})_2-\beta\text{-SbW}_9] (2)$

|                                                  |                                                              |                                     |                                                                                       |                           |
|--------------------------------------------------|--------------------------------------------------------------|-------------------------------------|---------------------------------------------------------------------------------------|---------------------------|
| Index ranges                                     | $-15 \leq h \leq 15, -16 \leq k \leq 16, -24 \leq l \leq 24$ | Theta range for data collection [°] | 4.23 to 50.696                                                                        |                           |
| Reflections number                               | 65919                                                        | Data / restraints / parameters      | 12045/37/798                                                                          |                           |
| Refinement method                                | Least squares                                                | Final R indices                     | all data                                                                              | R1 = 0.0519, wR2 = 0.0956 |
| Function minimized                               | $\sum w(F_o^2 - F_c^2)^2$                                    |                                     | I > 2σ(I)                                                                             | R1 = 0.0403, wR2 = 0.0915 |
| Goodness-of-fit on F <sup>2</sup>                | 1018                                                         | Weighting scheme                    | w=1/[σ <sup>2</sup> (F <sub>o</sub> <sup>2</sup> )+(0.0329P) <sup>2</sup> +128.4466P] |                           |
| Largest diff. peak and hole [e Å <sup>-3</sup> ] | 3.72/-1.82                                                   |                                     | where P=(F <sub>o</sub> <sup>2</sup> +2F <sub>c</sub> <sup>2</sup> )/3                |                           |

**Table S10:** Sample and crystal data of  $(\text{TMA})(\text{C}_{12}\text{N}_4\text{H}_{11})_5[(\text{Zn}(\text{H}_2\text{O}))_6(\text{B}-\alpha\text{-SbW}_9\text{O}_{33})_2](\text{TMA})(\text{C}_{12}\text{N}_4\text{H}_{11})_5[\text{Zn}_6-\alpha\text{-SbW}_9] (1)$

|                                             |                                                                                            |                                              |             |            |
|---------------------------------------------|--------------------------------------------------------------------------------------------|----------------------------------------------|-------------|------------|
|                                             | $\text{C}_{68}\text{H}_{109}\text{N}_{22}\text{O}_{94}\text{Sb}_2\text{W}_{18}\text{Zn}_6$ | Crystal system                               | triclinic   |            |
| Formula weight [g/mol]                      | 6683.79                                                                                    | Space group                                  | <i>P</i> -1 |            |
| Temperature [K]                             | 100.0                                                                                      | Z                                            | 1           |            |
| Measurement method                          | \w scans                                                                                   | Volume [Å <sup>3</sup> ]                     | 3467.5(4)   |            |
| Radiation (Wavelength [Å])                  | MoKα (λ = 0.71073)                                                                         | Unit cell dimensions [Å] and [°]             | 12.4792(8)  | 94.425(4)  |
| Crystal size / [mm <sup>3</sup> ]           | 0.14 × 0.07 × 0.03                                                                         |                                              | 17.4813(13) | 109.140(3) |
| Crystal habit                               | clear red block                                                                            |                                              | 17.6938(11) | 104.946(4) |
| Density (calculated) / [g/cm <sup>3</sup> ] | 3201                                                                                       | Absorption coefficient / [mm <sup>-1</sup> ] | 16367       |            |
| Abs. correction Tmin                        | 0.4281                                                                                     | Abs. correction Tmax                         | 0.7460      |            |
| Abs. correction type                        | multi-scan                                                                                 | F(000) [e <sup>-</sup> ]                     | 3037.0      |            |

**Table S11:** Data collection and structure refinement of  $(\text{TMA})(\text{C}_{12}\text{N}_4\text{H}_{11})_5[(\text{Zn}(\text{H}_2\text{O}))_6(\text{B}-\alpha\text{-SbW}_9\text{O}_{33})_2](\text{TMA})(\text{C}_{12}\text{N}_4\text{H}_{11})_5[\text{Zn}_6-\alpha\text{-SbW}_9] (1)$

|                                                       |                                                              |                                            |                                              |                           |
|-------------------------------------------------------|--------------------------------------------------------------|--------------------------------------------|----------------------------------------------|---------------------------|
| <b>Index ranges</b>                                   | $-15 \leq h \leq 15, -21 \leq k \leq 21, -21 \leq l \leq 21$ | <b>Theta range for data collection [°]</b> | 4.688 to 50.7                                |                           |
| <b>Reflections number</b>                             | 56012                                                        | <b>Data / restraints / parameters</b>      | 12509/108/973                                |                           |
| <b>Refinement method</b>                              | Least squares                                                | <b>Final R indices</b>                     | all data                                     | R1 = 0.0683, wR2 = 0.1124 |
| <b>Function minimized</b>                             | $\Sigma w(F_o^2 - F_c^2)^2$                                  |                                            | I > 2σ(I)                                    | R1 = 0.0449, wR2 = 0.1007 |
| <b>Goodness-of-fit on F<sup>2</sup></b>               | 1027                                                         | <b>Weighting scheme</b>                    | $w=1/[\sigma^2(F_o^2)+(0.0432P)^2+53.8347P]$ |                           |
| <b>Largest diff. peak and hole [e Å<sup>-3</sup>]</b> | 2.10/-1.89                                                   |                                            | where $P=(F_o^2+2F_c^2)/3$                   |                           |

**Table S12:** Sample and crystal data of  $(TMA)_6[(Zn(H_2O))_6(B-\alpha-SbW_9O_{33})_2]$   $(TMA)_6[Zn_6-\alpha-SbW_9]$  (1)

|                                                  |                                       |                                                   |             |           |
|--------------------------------------------------|---------------------------------------|---------------------------------------------------|-------------|-----------|
| <b>Chemical formula</b>                          | $C_{16}H_{48}N_4O_{72}Sb_2W_{18}Zn_6$ | <b>Crystal system</b>                             | monoclinic  |           |
| <b>Formula weight [g/mol]</b>                    | 5393.60                               | <b>Space group</b>                                | $C2/m$      |           |
| <b>Temperature [K]</b>                           | 100                                   | <b>Z</b>                                          | 2           |           |
| <b>Measurement method</b>                        | f and w scans                         | <b>Volume [Å<sup>3</sup>]</b>                     | 6060.2(7)   |           |
| <b>Radiation (Wavelength [Å])</b>                | MoKα ( $\lambda = 0.71073$ )          | <b>Unit cell dimensions [Å] and [°]</b>           | 14.5029(12) | 90.0      |
| <b>Crystal size / [mm<sup>3</sup>]</b>           | $0.3 \times 0.28 \times 0.24$         |                                                   | 23.1699(12) | 95.440(4) |
| <b>Crystal habit</b>                             | clear colorless block                 |                                                   | 18.1162(11) | 90.0      |
| <b>Density (calculated) / [g/cm<sup>3</sup>]</b> | 2956                                  | <b>Absorption coefficient / [mm<sup>-1</sup>]</b> | 18674       |           |
| <b>Abs. correction Tmin</b>                      | 0.1335                                | <b>Abs. correction Tmax</b>                       | 0.7460      |           |
| <b>Abs. correction type</b>                      | multi-scan                            | <b>F(000) [e<sup>-</sup>]</b>                     | 4724.0      |           |

**Table S13:** Data collection and structure refinement of  $(TMA)_6[(Zn(H_2O))_6(B-\alpha-SbW_9O_{33})_2]$   $(TMA)_6[Zn_6-\alpha-SbW_9]$  (1)

|                                                         |                                                              |                                            |                                                                                       |                              |
|---------------------------------------------------------|--------------------------------------------------------------|--------------------------------------------|---------------------------------------------------------------------------------------|------------------------------|
| <b>Index ranges</b>                                     | $-19 \leq h \leq 19, -30 \leq k \leq 30, -23 \leq l \leq 23$ | <b>Theta range for data collection</b> [°] | 4.166 to 55.752                                                                       |                              |
| <b>Reflections number</b>                               | 151418                                                       | <b>Data / restraints / parameters</b>      | 7386/108/284                                                                          |                              |
| <b>Refinement method</b>                                | Least squares                                                | <b>Final R indices</b>                     | all data                                                                              | R1 = 0.0783,<br>wR2 = 0.2026 |
| <b>Function minimized</b>                               | $\sum w(F_o^2 - F_c^2)^2$                                    |                                            | I > 2σ(I)                                                                             | R1 = 0.0753,<br>wR2 = 0.1982 |
| <b>Goodness-of-fit on F<sup>2</sup></b>                 | 1069                                                         | <b>Weighting scheme</b>                    | w=1/[σ <sup>2</sup> (F <sub>o</sub> <sup>2</sup> )+(0.1346P) <sup>2</sup> +178.2807P] |                              |
| <b>Largest diff. peak and hole</b> [e Å <sup>-3</sup> ] | 3.34/-6.82                                                   |                                            | where P=(F <sub>o</sub> <sup>2</sup> +2F <sub>c</sub> <sup>2</sup> )/3                |                              |

**Table S14:** Sample and crystal data of (TMA)<sub>2</sub>Na<sub>6</sub>H<sub>8</sub>[(Mn(H<sub>2</sub>O)<sub>3</sub>)<sub>2</sub>(CdCl<sub>0.8</sub>O<sub>1.2</sub>)<sub>2</sub>(B-β-SbW<sub>9</sub>O<sub>33</sub>)<sub>2</sub>] [Cd<sub>2</sub>Mn<sub>2</sub>-β-SbW<sub>9</sub>] (3)

|                                                  |                                                                                                                                                   |                                                   |             |           |
|--------------------------------------------------|---------------------------------------------------------------------------------------------------------------------------------------------------|---------------------------------------------------|-------------|-----------|
| <b>Chemical formula</b>                          | C <sub>8</sub> H <sub>32</sub> Cd <sub>2</sub> ClMn <sub>2</sub> N <sub>2</sub> Na <sub>6</sub> O <sub>93.5</sub> Sb <sub>2</sub> W <sub>18</sub> | <b>Crystal system</b>                             | triclinic   |           |
| <b>Formula weight [g/mol]</b>                    | 5713,22                                                                                                                                           | <b>Space group</b>                                | P-1         |           |
| <b>Temperature [K]</b>                           | 101,85                                                                                                                                            | <b>Z</b>                                          | 1           |           |
| <b>Measurement method</b>                        | f and w scans                                                                                                                                     | <b>Volume [Å<sup>3</sup>]</b>                     | 2471.2(3)   |           |
| <b>Radiation (Wavelength [Å])</b>                | MoKα (λ = 0.71073)                                                                                                                                | <b>Unit cell dimensions [Å] and [°]</b>           | 12.3753(7)  | 70.120(2) |
| <b>Crystal size / [mm<sup>3</sup>]</b>           | 0.451 × 0.136 × 0.042                                                                                                                             |                                                   | 13.6520(8)  | 83.879(2) |
| <b>Crystal habit</b>                             | clear orange block                                                                                                                                |                                                   | 17.0910(10) | 65.614(2) |
| <b>Density (calculated) / [g/cm<sup>3</sup>]</b> | 3,839                                                                                                                                             | <b>Absorption coefficient / [mm<sup>-1</sup>]</b> | 22,216      |           |
| <b>Abs. correction Tmin</b>                      | 0,0003                                                                                                                                            | <b>Abs. correction Tmax</b>                       | 0,0082      |           |
| <b>Abs. correction type</b>                      | multi-scan                                                                                                                                        | <b>F(000) [e<sup>-</sup>]</b>                     | 2505        |           |

**Table S15:** Data collection and structure refinement of (TMA)<sub>2</sub>Na<sub>6</sub>H<sub>8</sub>[(Mn(H<sub>2</sub>O)<sub>3</sub>)<sub>2</sub>(CdCl<sub>0.8</sub>O<sub>1.2</sub>)<sub>2</sub>(B-β-SbW<sub>9</sub>O<sub>33</sub>)<sub>2</sub>] [Cd<sub>2</sub>Mn<sub>2</sub>-β-SbW<sub>9</sub>] (3)

|                           |                                                              |                                            |               |  |
|---------------------------|--------------------------------------------------------------|--------------------------------------------|---------------|--|
| <b>Index ranges</b>       | $-14 \leq h \leq 14, -16 \leq k \leq 16, -20 \leq l \leq 20$ | <b>Theta range for data collection</b> [°] | 4.498 to 50.7 |  |
| <b>Reflections number</b> | 42040                                                        | <b>Data / restraints / parameters</b>      | 8983/75/675   |  |

|                                                                     |                             |                         |                                                                        |                           |
|---------------------------------------------------------------------|-----------------------------|-------------------------|------------------------------------------------------------------------|---------------------------|
| <b>Refinement method</b>                                            | Least squares               | <b>Final R indices</b>  | all data                                                               | R1 = 0.0713, wR2 = 0.1780 |
| <b>Function minimized</b>                                           | $\Sigma w(F_o^2 - F_c^2)^2$ |                         | I>2 $\sigma$ (I)                                                       | R1 = 0.0652, wR2 = 0.1693 |
| <b>Goodness-of-fit on F<sup>2</sup></b>                             | 1,109                       | <b>Weighting scheme</b> | w=1/[ $\sigma^2(F_o^2)+(0.1280P)^2+11.0744P$ ]                         |                           |
| <b>Largest diff. peak and hole [e <math>\text{\AA}^{-3}</math>]</b> | 3.97/-1.83                  |                         | where P=(F <sub>o</sub> <sup>2</sup> +2F <sub>c</sub> <sup>2</sup> )/3 |                           |

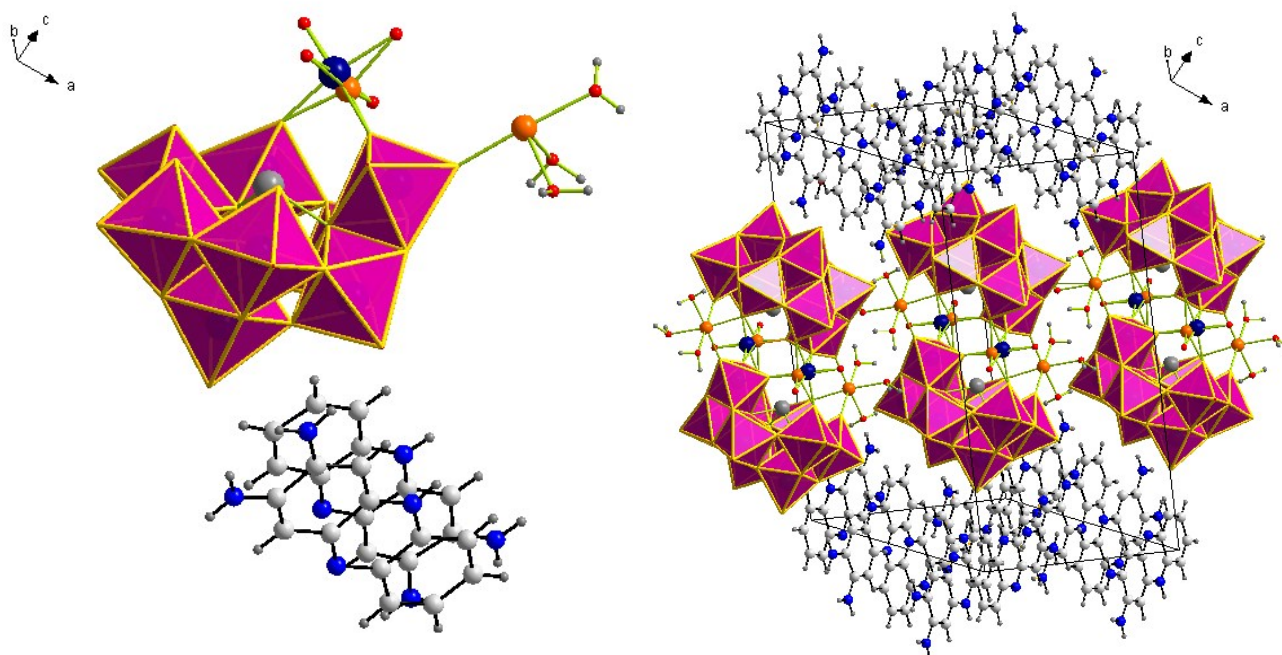

**Figure S9:** Asymmetric unit and packing of [Mn- $\beta$ -SbW<sub>9</sub>] (CCDC 1569737) along the z-axis. Color legend: WO<sub>6</sub>, pink, octahedra; W, blue; O, red; C, grey; Mn, orange; N, dark blue; Sb, grey

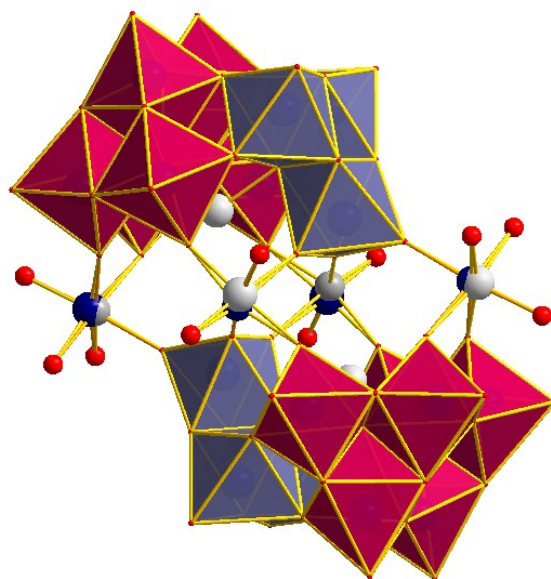

**Figure S10:** Polyhedral representation of  $[(\text{Zn}/\text{W})_2\text{-}\beta\text{-SbW}_9]$  (**2**) (CCDC 1569739) showing the four disordered Zn/W centers. Color legend:  $\text{WO}_6$ , pink; octahedral;  $\text{WO}_6$   $60^\circ$  rotated, ice blue; W, dark blue; Zn, silver; Sb, white; O, red.

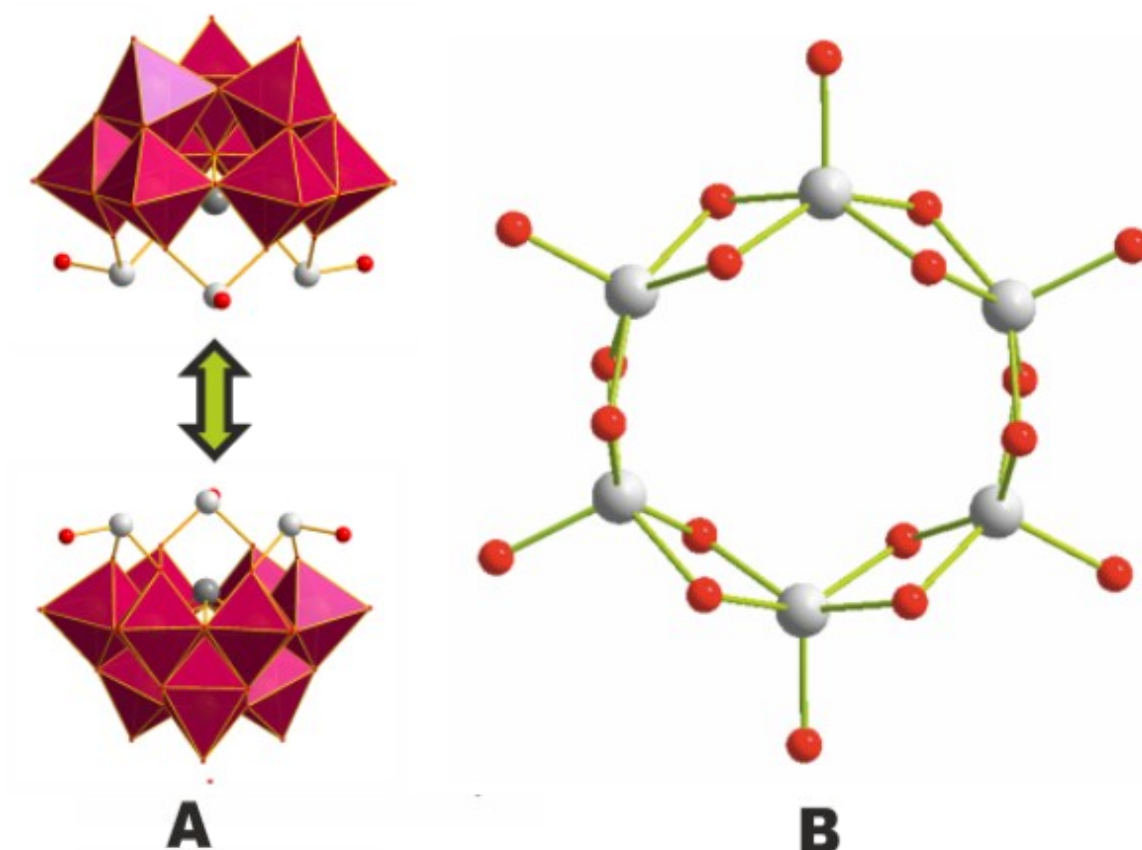

**Figure S11:** Polyhedral representation of  $[\text{Zn}_6\text{-}\alpha\text{-SbW}_9]$  (**1**) (CCDC 1576366/CCDC 1569738) showing both  $[(\text{Zn}(\text{H}_2\text{O}))_3(\text{B-}\beta\text{-SbW}_9\text{O}_{33})]$  building blocks related by an inversion center (A) and  $\text{Zn}_6$ -hexagon ring (B). Color legend:  $\text{WO}_6$ , pink, octahedra; O, red; Zn, silver; Sb, dark grey.

## 6 PXRD

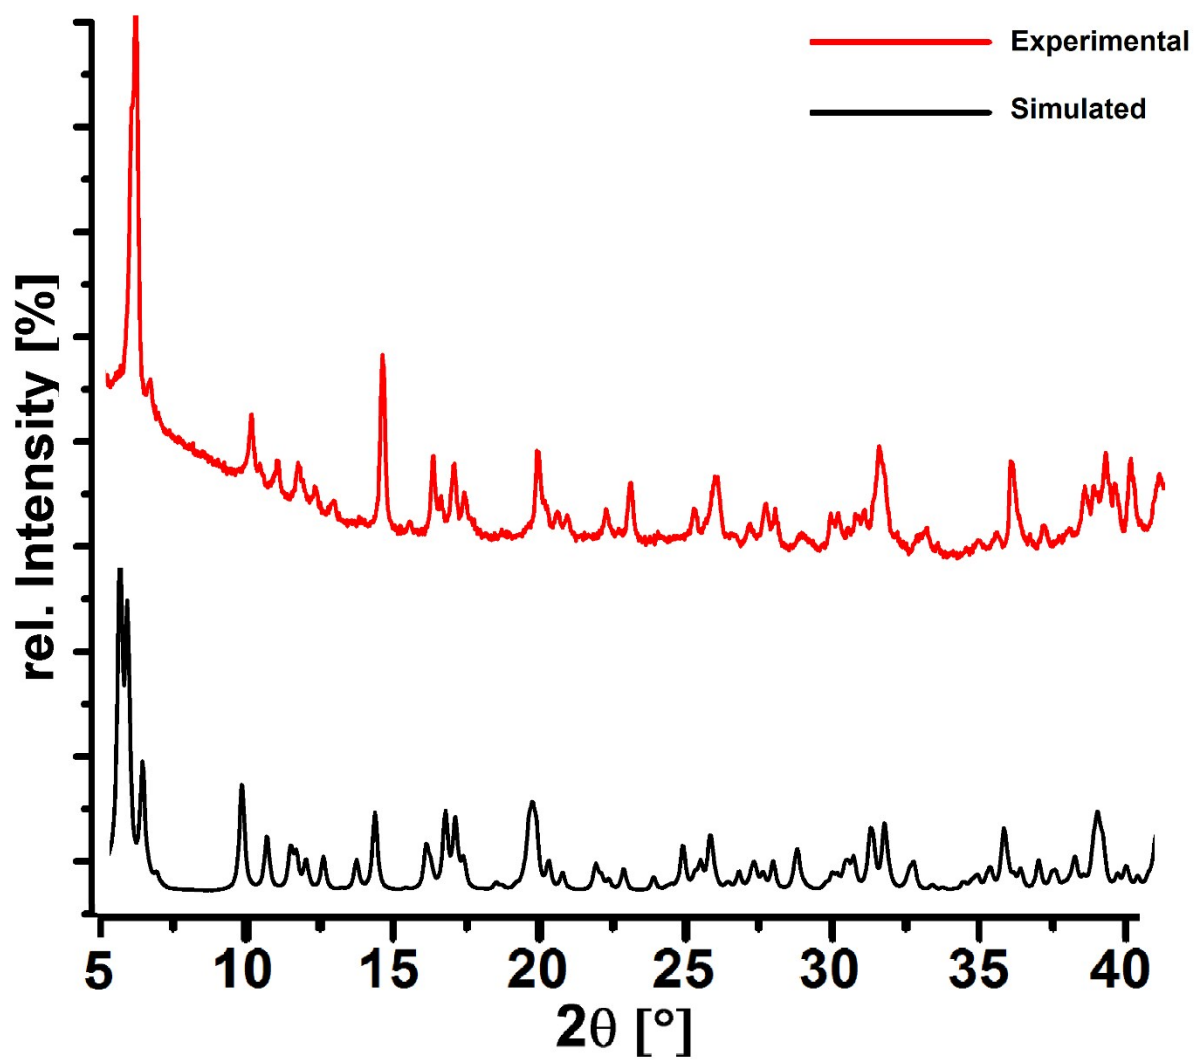

**Figure S12:** Comparison of the experimental and simulated PXRD patterns of  $[(\text{Zn}/\text{W})_2\text{-}\beta\text{-SbW}_9]$  (2).

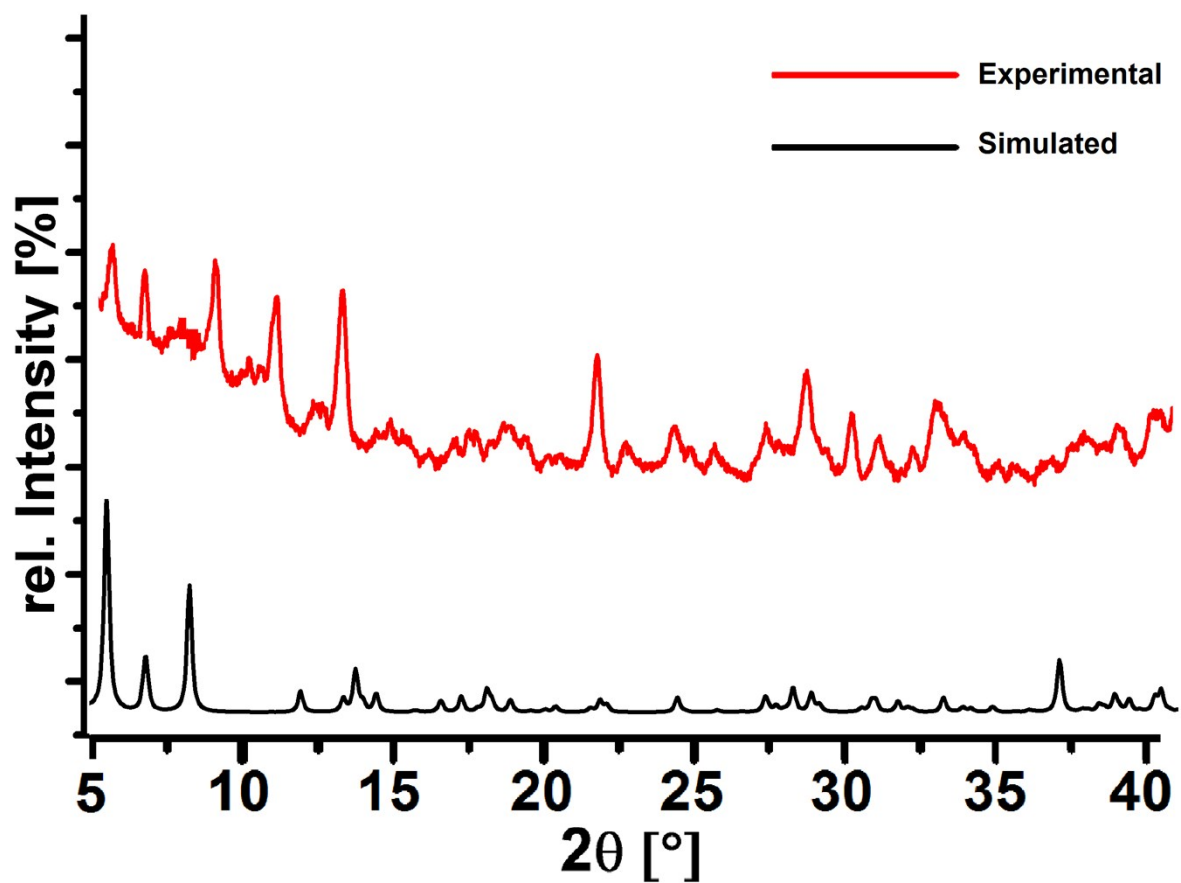

**Figure S13:** Comparison of the experimental and simulated PXRD patterns of  $(\text{TMA})_6[\text{Zn}_6\text{-}\alpha\text{-SbW}_9]$  (1).

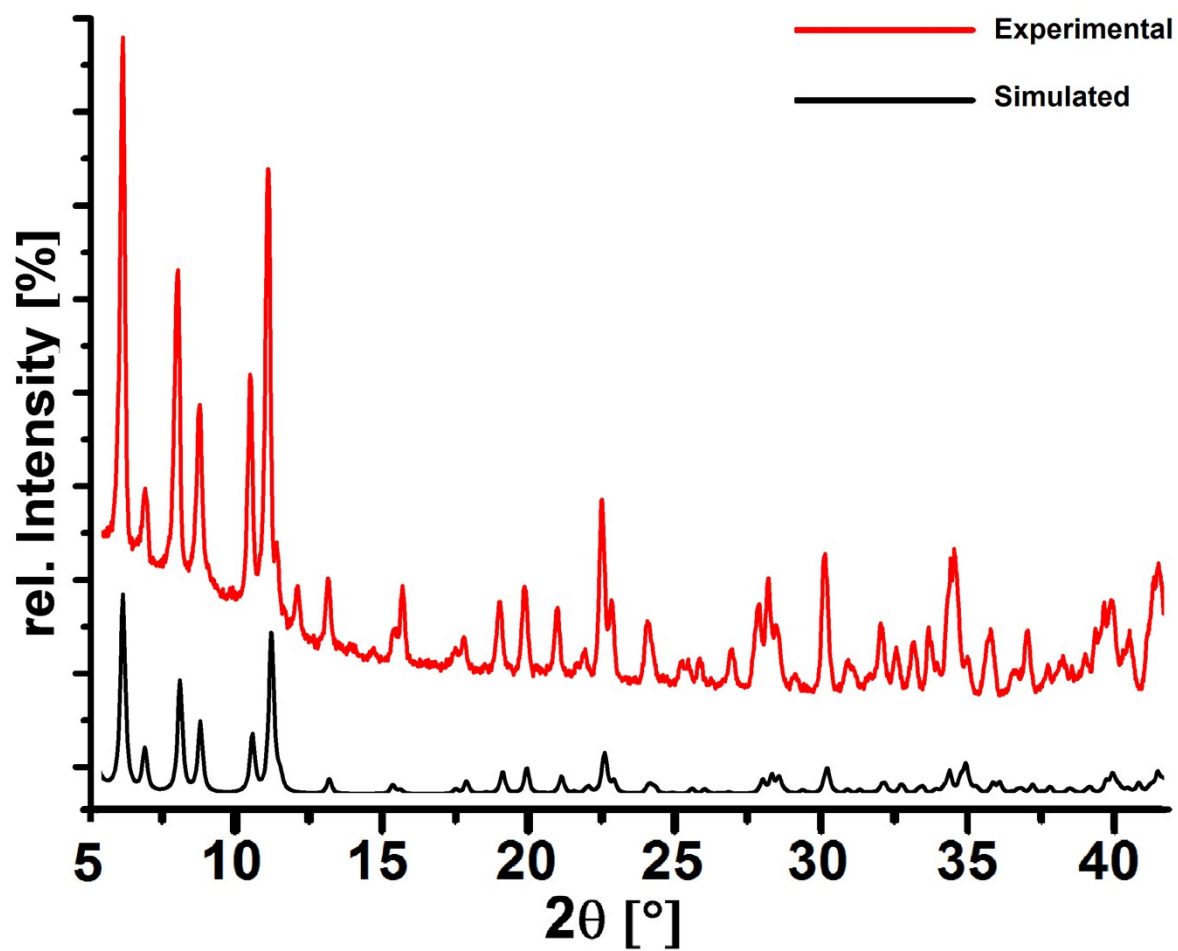

**Figure S14:** Comparison of the experimental and simulated PXRD patterns of  $[\text{Cd}_2\text{Mn}_2\text{-}\beta\text{-SbW}_9]$  (**3**).



## 7 UV-vis Spectroscopy

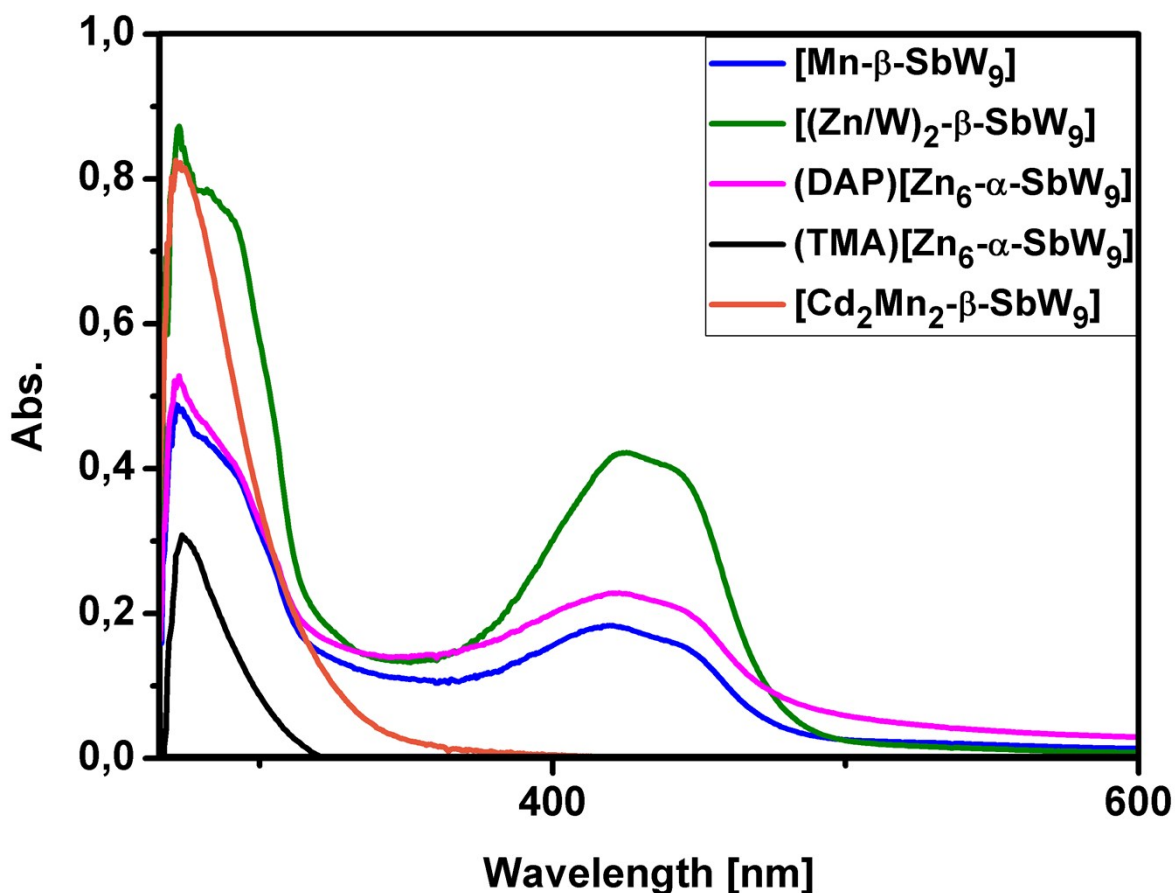

**Figure S15:** UV/Vis-spectrum of  $[\text{Mn-}\beta\text{-SbW}_9]$ ,  $[(\text{Zn/W})_2\text{-}\beta\text{-SbW}_9]$  (**2**),  $(\text{TMA})(\text{C}_{12}\text{N}_4\text{H}_{11})_5[\text{Zn}_6\text{-}\alpha\text{-SbW}_9]$  (**1**),  $(\text{TMA})_6[\text{Zn}_6\text{-}\alpha\text{-SbW}_9]$  (**1**) and  $[\text{Cd}_2\text{Mn}_2\text{-}\beta\text{-SbW}_9]$  (**3**) showing typical O→W ligand-to-metal charge-transfer (272 nm) and aromatic transitions (425 nm)

**Table S16:** Concentrations of corresponding POM compound in sodium acetate buffer (pH 5.5, NaOAc/AcOH 10 mM). (Fig. S15).

| POM compound                                                                                                | Concentration [mg/mL] |
|-------------------------------------------------------------------------------------------------------------|-----------------------|
| $[\text{Mn-}\beta\text{-SbW}_9]$                                                                            | 0.30                  |
| $[(\text{Zn/W})_2\text{-}\beta\text{-SbW}_9]$ ( <b>2</b> )                                                  | 0.04                  |
| $(\text{TMA})(\text{C}_{12}\text{N}_4\text{H}_{11})_5[\text{Zn}_6\text{-}\alpha\text{-SbW}_9]$ ( <b>1</b> ) | 0.55                  |
| $(\text{TMA})_6[\text{Zn}_6\text{-}\alpha\text{-SbW}_9]$ ( <b>1</b> )                                       | 0.09                  |
| $[\text{Cd}_2\text{Mn}_2\text{-}\beta\text{-SbW}_9]$ ( <b>3</b> )                                           | 0.61                  |

## 8 ESI-Mass Spectrometry

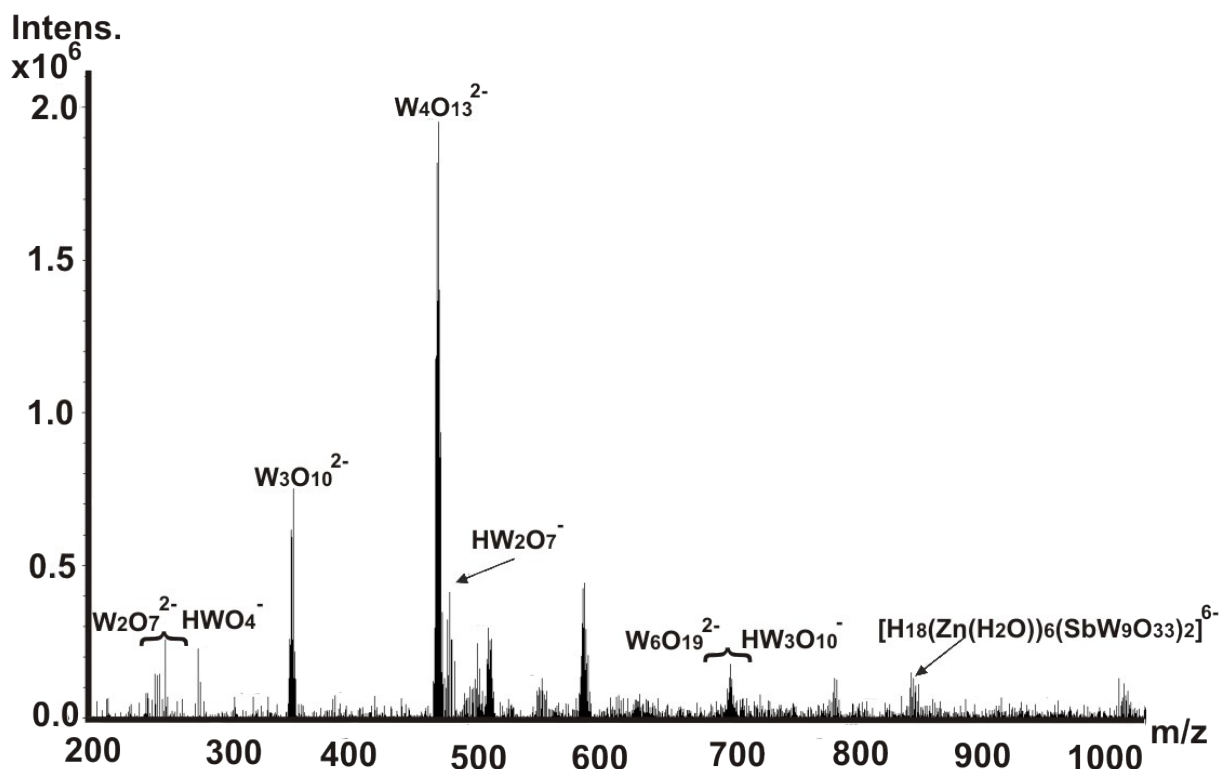

**Figure S16:** ESI-mass spectrum of  $(\text{TMA})_6[\text{Zn}_6\text{-}\alpha\text{-SbW}_9]$  (**1**) revealing W-containing decomposition products based on the polyanion.

**Table S17:** Species assigned to the peaks in the ESI-MS spectrum of  $(\text{TMA})_6[(\text{Zn}(\text{H}_2\text{O}))_6(\text{B-}\alpha\text{-SbW}_9\text{O}_{33})_2] \cdot 37.5 \text{ H}_2\text{O}$  (**1**) (Fig. S16).

| m/z    | m/z (calc.) | Peak Assignment                                                         |
|--------|-------------|-------------------------------------------------------------------------|
| 239.74 | 239.93      | $[\text{W}_2\text{O}_7]^{2-}$                                           |
| 248.8  | 248.80      | $\text{H}[\text{WO}_4]^-$                                               |
| 355.8  | 355.80      | $[\text{W}_3\text{O}_{10}]^{2-}$                                        |
| 471.75 | 471.75      | $[\text{W}_4\text{O}_{13}]^{2-}$                                        |
| 480.74 | 480.87      | $\text{H}[\text{W}_2\text{O}_7]^{2-}$                                   |
| 703.56 | 703.80      | $[\text{W}_6\text{O}_{19}]^{2-}$                                        |
| 712.5  | 712.50      | $\text{H}[\text{W}_3\text{O}_{10}]^-$                                   |
| 851.48 | 851.54      | $[(\text{Zn}(\text{H}_2\text{O}))_6(\text{SbW}_9\text{O}_{33})_2]^{6-}$ |

## 9 POM-Protein Interactions

**SDS-PAGE:** Human serum albumin (HSA) (5  $\mu$ g) was dissolved with 1, 10, and 100 equivalents of corresponding POM in 25% (v/v) DMSO solution (Fig. S17 A-F) or 10 mM NaOAc buffer pH 5.5 (Fig. S17 G-N), respectively, and incubated at three different temperatures.

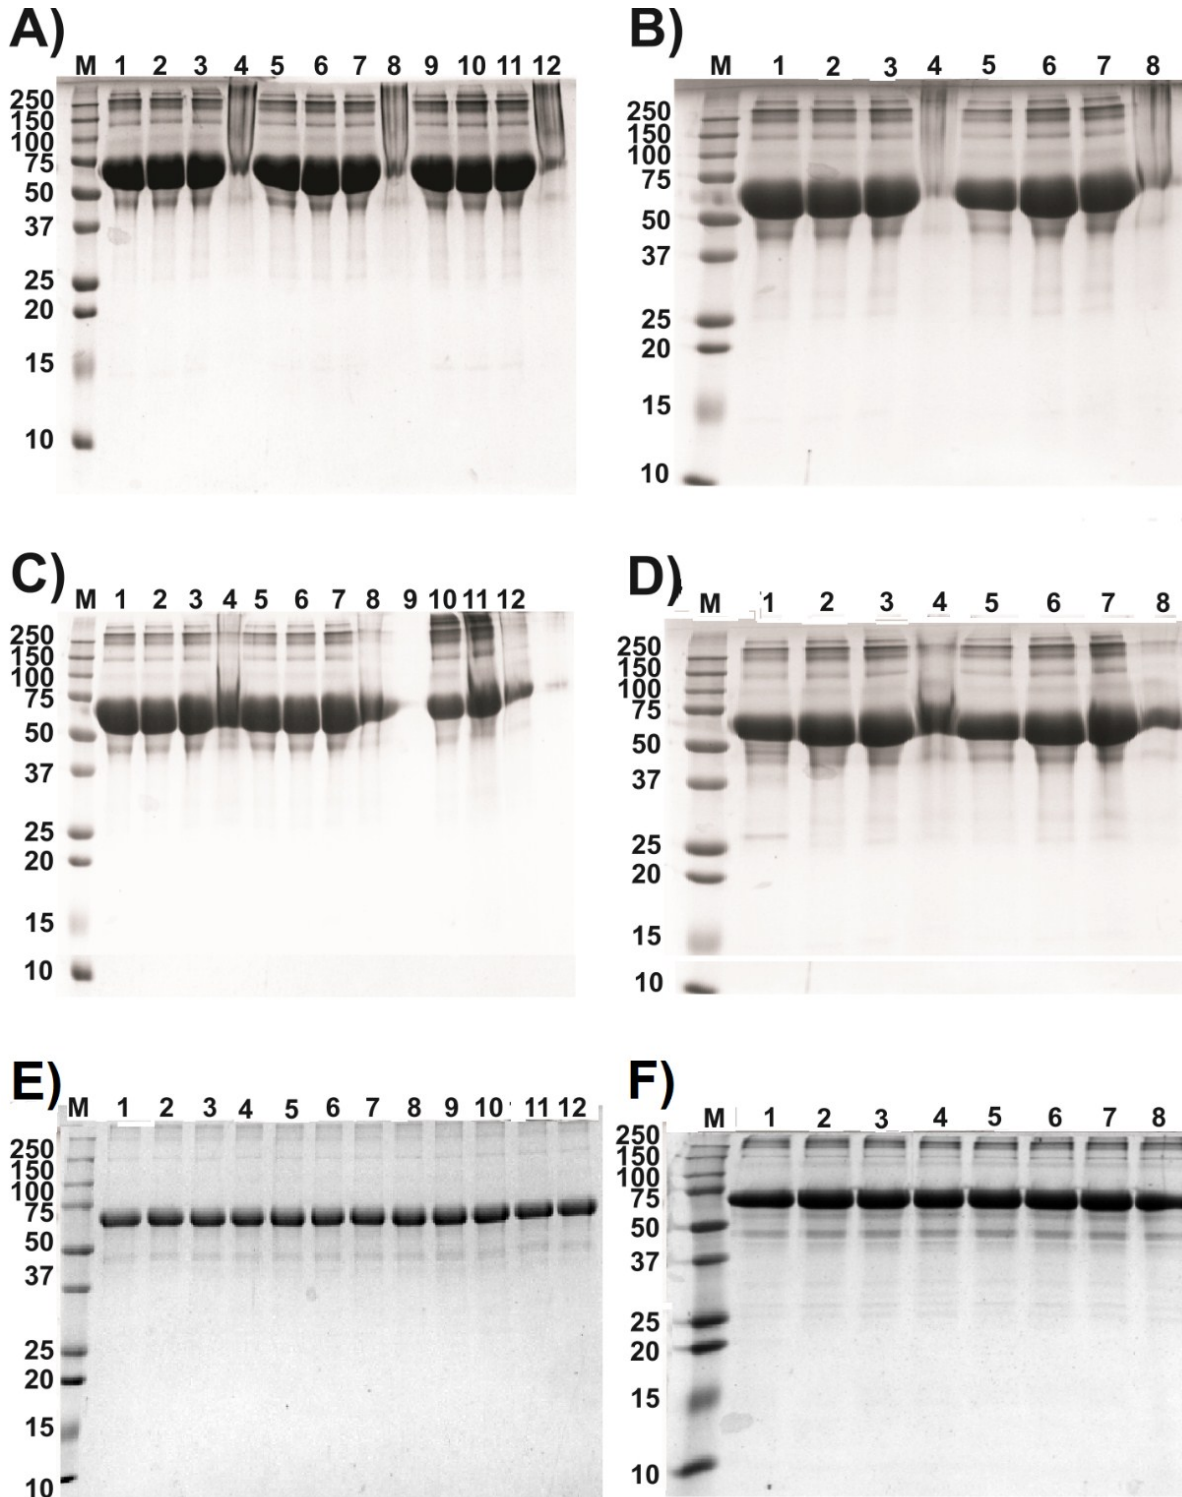

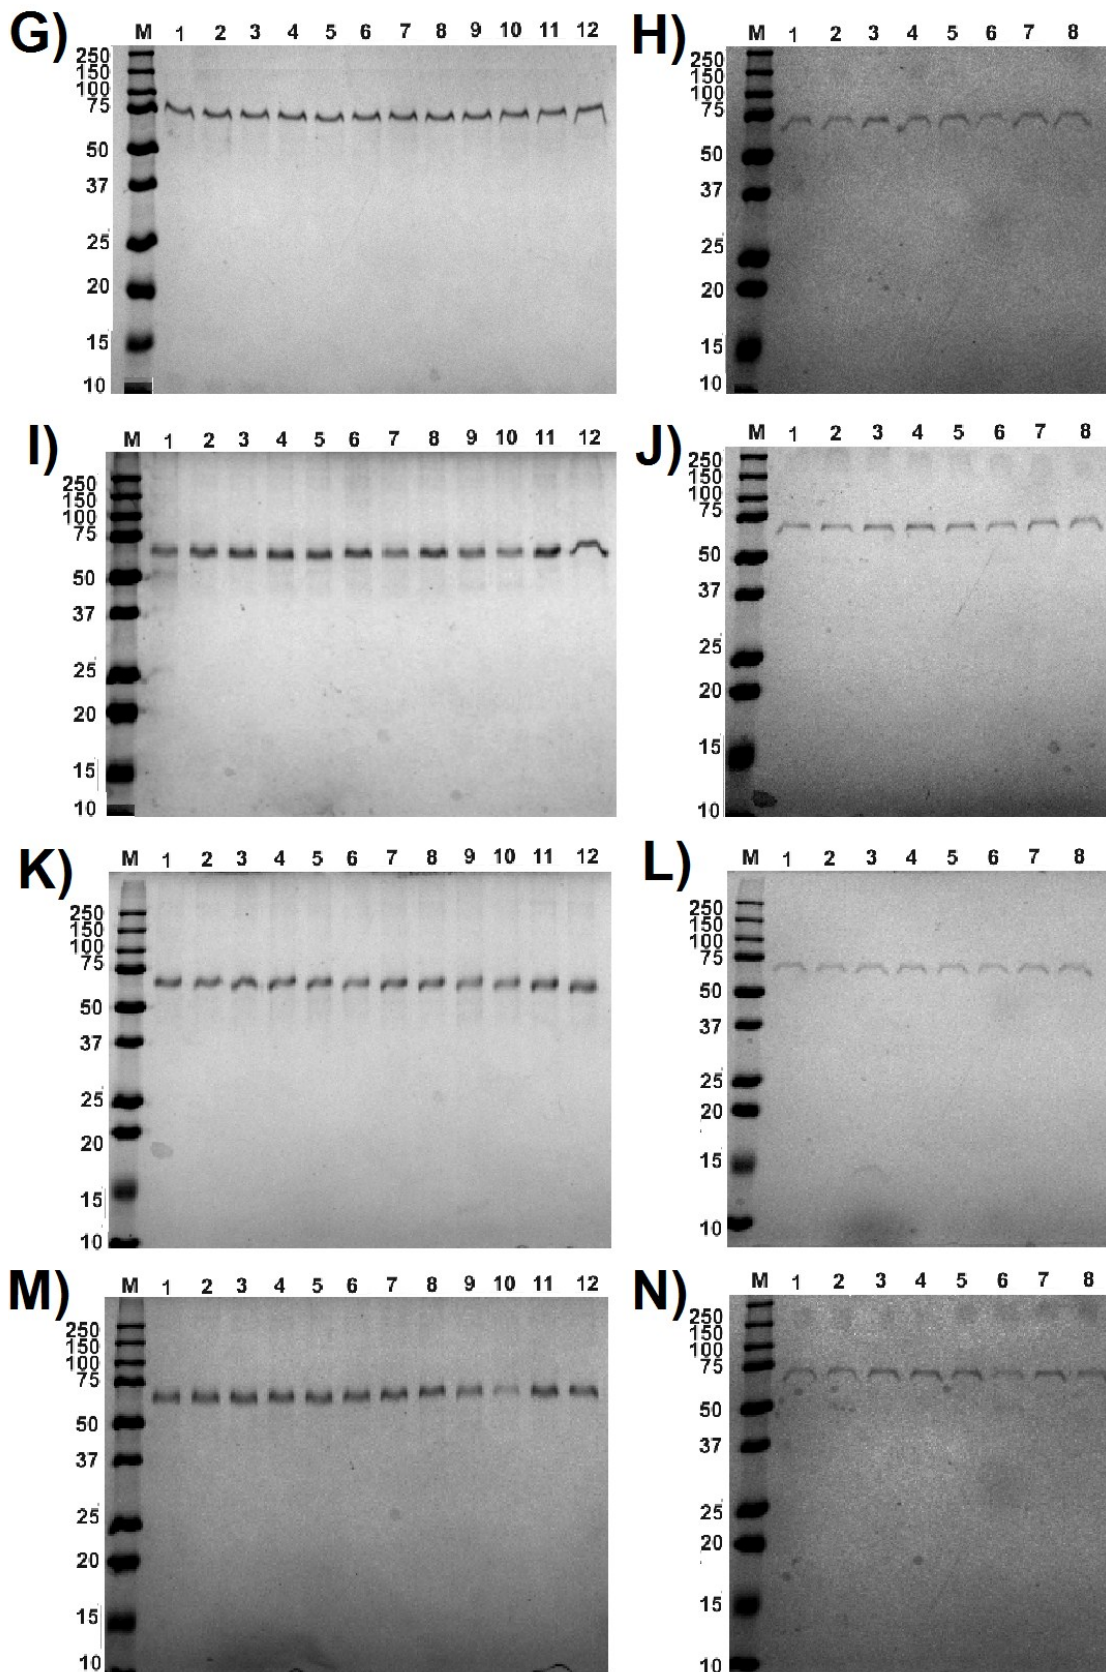

**Figure S17:** HSA with corresponding POM for 30 minutes at 20°C (1-4), at 37°C (5-8) and at 65°C (9-12) 1) 5  $\mu$ g HSA, 2) 1:1 HSA:POM, 3) 1:10 HSA:POM, 4) 1:100 HSA:POM., 5) 5  $\mu$ g HSA, 6) 1:1 HSA:POM, 7) 1:10 HSA:POM, 8) 1:100 HSA:POM, 9) 5  $\mu$ g HSA, 10) 1:1 HSA:POM, 11) 1:10 HSA:POM, 12) 1:100 HSA:POM in NaOAc buffer [10 mM] 5.5 pH **A**) HSA with  $[(Zn/W)_2-\beta-SbW_9]$  (2) after 30 min **B**) HSA with  $[(Zn/W)_2-\beta-SbW_9]$  (2) after 3 days

**C)** HSA with  $[\text{Mn-}\beta\text{-SbW}_9]$  after 30min **D)** HSA with  $[\text{Mn-}\beta\text{-SbW}_9]$  after 3 days. **E)** HSA with  $[\text{Cd}_2\text{Mn}_2\text{-}\beta\text{-SbW}_9]$  (**3**) after 30 min. **F)** HSA with  $[\beta\text{-Cd}_2\text{Mn}_2\text{SbW}_9]$  (**3**) after 3 days. **G)** HSA with  $[(\text{Zn/W})_2\text{-}\beta\text{-SbW}_9]$  (**2**) after 30 min **H)** HSA with  $[(\text{Zn/W})_2\text{-}\beta\text{-SbW}_9]$  (**2**) after 3 days **I)** HSA with  $[\text{Mn-}\beta\text{-SbW}_9]$  after 30min **J)** HSA with  $[\text{Mn-}\beta\text{-SbW}_9]$  after 3 days. **K)** HSA with  $[\text{Cd}_2\text{Mn}_2\text{-}\beta\text{-SbW}_9]$  (**3**) after 30 min. **L)** HSA with  $[\beta\text{-Cd}_2\text{Mn}_2\text{SbW}_9]$  (**3**) after 3 days. **M)** HSA with  $(\text{TMA})_6[(\text{Zn}(\text{H}_2\text{O}))_6(\text{B-}\alpha\text{-SbW}_9\text{O}_{33})_2]$  (**1**) after 30 min. **N)** HSA with  $(\text{TMA})_6[(\text{Zn}(\text{H}_2\text{O}))_6(\text{B-}\alpha\text{-SbW}_9\text{O}_{33})_2]$  (**1**) after 3 days.

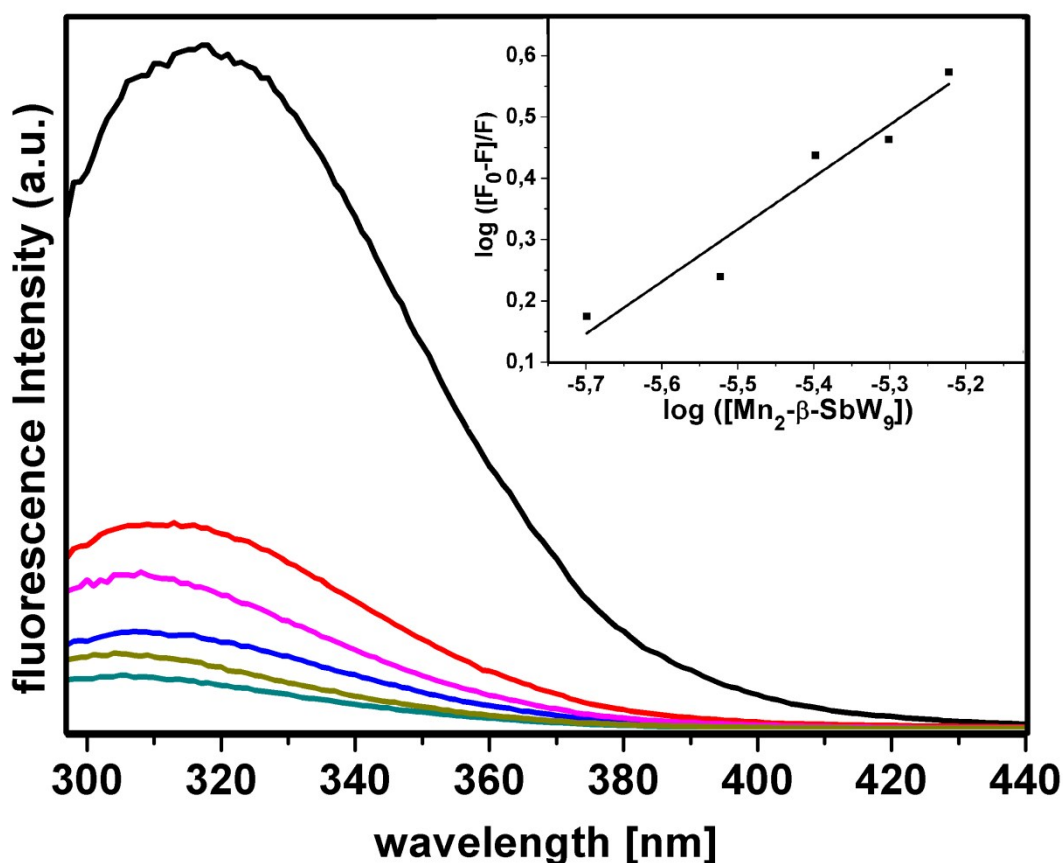

**Figure S18:** Emission fluorescence spectra of  $[\text{Mn}_2\text{-}\beta\text{-SbW}_9]$  with HSA  $[\text{HSA}] = 10^{-5} \text{ M}^{-1}$ , in 10 mM NaOAc buffer pH 5.5. The top line is collected in the absence of  $[\text{Mn}_2\text{-}\beta\text{-SbW}_9]$  followed by stepwise increase (0.2, 0.3, 0.4, 0.5 and 0.6 fold of  $[\text{Mn}_2\text{-}\beta\text{-SbW}_9]$ ). In the inset, the plot of the derived Stern–Volmer equation is depicted (with  $R^2 = 0.95$ ).

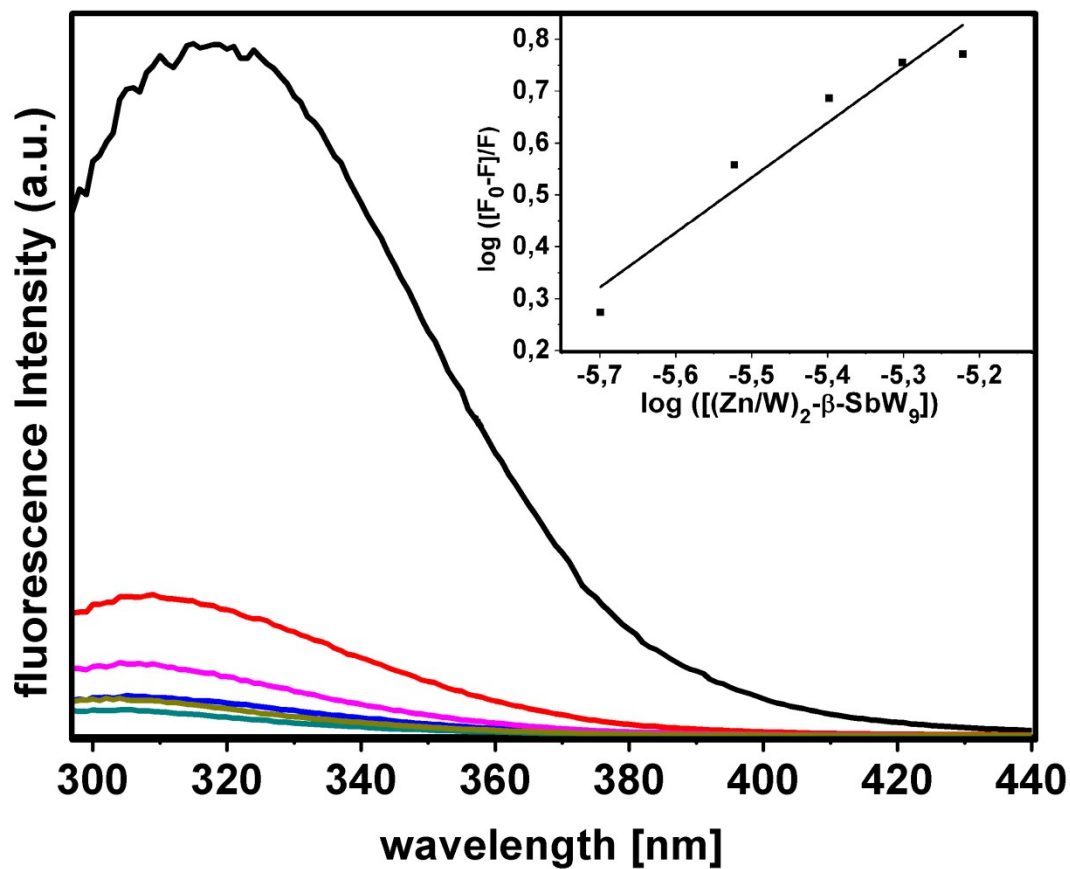

**Figure S19:** Emission fluorescence spectra of  $[(Zn/W)_2-\beta-SbW_9]$  (**2**) with HSA  $[HSA] = 10^{-5} M^{-1}$ , in 10 mM NaOAc buffer pH 5.5. The top line is collected in the absence of  $[(Zn/W)_2-\beta-SbW_9]$  (**2**) followed by stepwise increase (0.2, 0.3, 0.4, 0.5 and 0.6 fold of  $[(Zn/W)_2-\beta-SbW_9]$  (**2**)). In the inset, the plot of the derived Stern–Volmer equation is depicted (with  $R^2 = 0.95$ ).

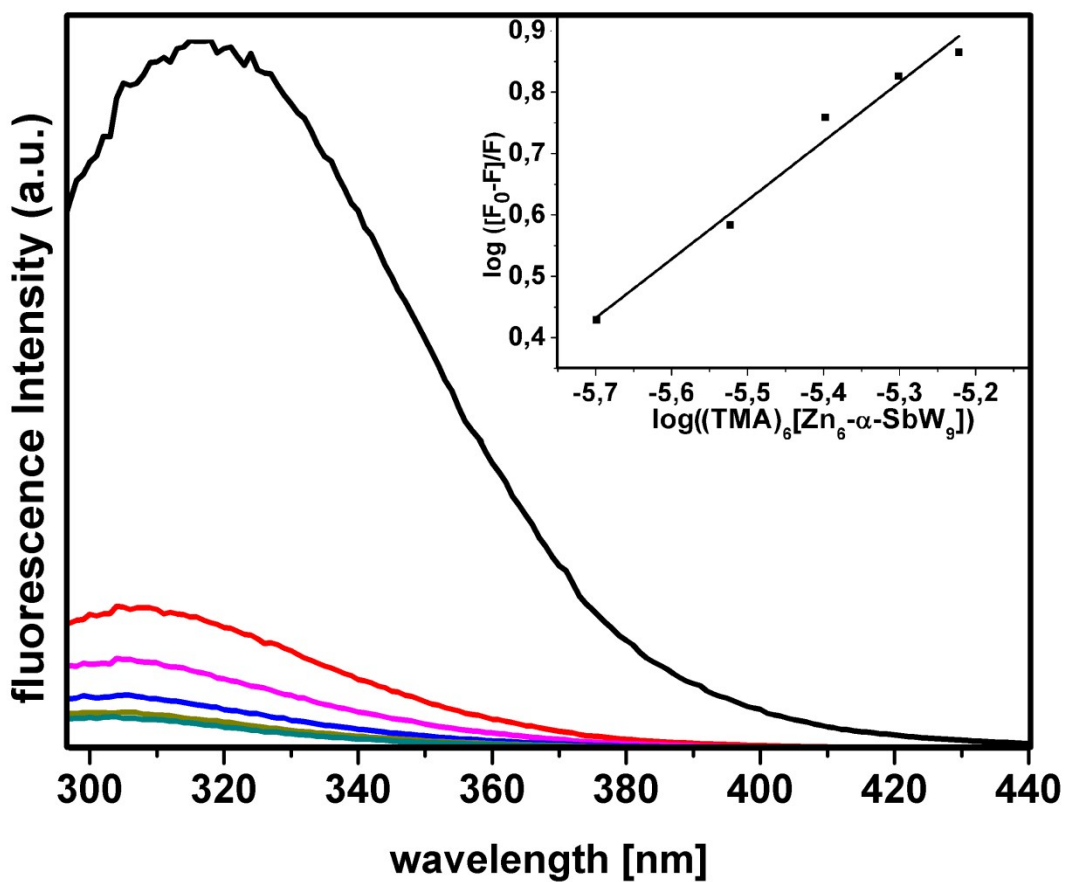

**Figure S20:** Emission fluorescence spectra of  $(TMA)_6[(Zn(H_2O))_6(B-\alpha-SbW_9O_{33})_2]$  (**1**) with HSA [ $HSA$ ] =  $10^{-5} M^{-1}$ , in 10 mM NaOAc buffer pH 5.5. The top line is collected in the absence of  $(TMA)_6[(Zn(H_2O))_6(B-\alpha-SbW_9O_{33})_2]$  (**1**) followed by stepwise increase (0.2, 0.3, 0.4, 0.5 and 0.6 fold of  $(TMA)_6[(Zn(H_2O))_6(B-\alpha-SbW_9O_{33})_2]$  (**1**). In the inset, the plot of the derived Stern–Volmer equation is depicted (with  $R^2 = 0.98$ ).

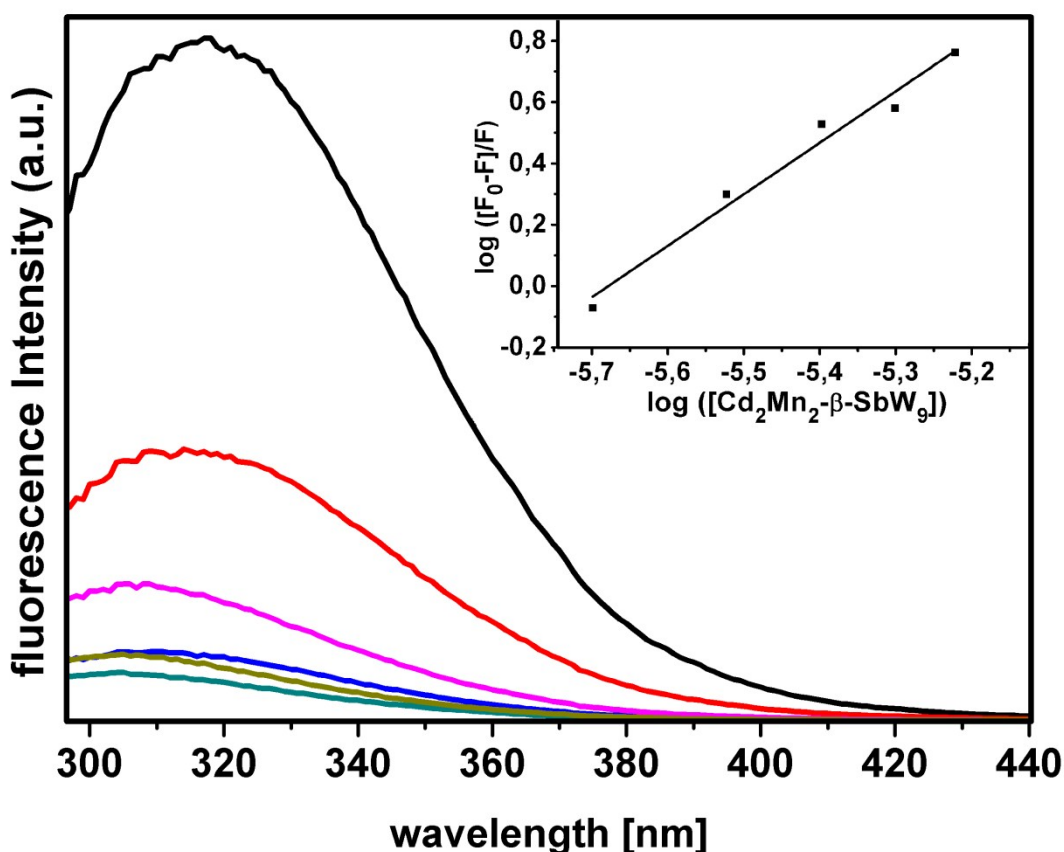

**Figure S21:** Emission fluorescence spectra of  $[\text{Cd}_2\text{Mn}_2\text{-}\beta\text{-SbW}_9]$  (**3**) with HSA  $[\text{HSA}] = 10^{-5} \text{ M}^{-1}$ , in 10 mM NaOAc buffer pH 5.5. The top line is collected in the absence of  $[\text{Cd}_2\text{Mn}_2\text{-}\beta\text{-SbW}_9]$  (**3**) followed by stepwise increase (0.2, 0.3, 0.4, 0.5 and 0.6 fold of  $[\text{Cd}_2\text{Mn}_2\text{-}\beta\text{-SbW}_9]$  (**3**)). In the inset, the plot of the derived Stern–Volmer equation is depicted (with  $R^2 = 0.98$ ).

**Table S18:** Quenching constants  $K_q$  and number ( $n$ ) of binding molecules for the HSA protein at pH 5.5

| POM                                                                                                           | $K_q [\text{M}^{-1}]$ | $n$  |
|---------------------------------------------------------------------------------------------------------------|-----------------------|------|
| $[\text{Mn-}\beta\text{-SbW}_9]$                                                                              | $1.1 \times 10^5$     | 0.85 |
| $[(\text{Zn/W})_2\text{-}\beta\text{-SbW}_9]$ ( <b>2</b> )                                                    | $2.2 \times 10^6$     | 1.10 |
| $(\text{TMA})_6[(\text{Zn}(\text{H}_2\text{O}))_6(\text{B-}\alpha\text{-SbW}_9\text{O}_{33})_2]$ ( <b>1</b> ) | $0.8 \times 10^6$     | 0.96 |
| $[\text{Cd}_2\text{Mn}_2\text{-}\beta\text{-SbW}_9]$ ( <b>3</b> )                                             | $3.4 \times 10^9$     | 1.60 |



## 10 References

---

- <sup>1</sup> M. Bösing, I. Loose, H. Pohlmann, B. Krebs, *Chem. Eur. J.* 1997, **3**, 1232.
- <sup>2</sup> U.K. Laemmlli, *Nature* 1970, **227**, 680-685.
- <sup>3</sup> J. Chen, G. Song, Y. He, Q. Yan, *Microchim. Acta*, 2007, **159**, 79-85.
- <sup>4</sup> Bruker SAINT v7.68A Copyright © 2005-2016 Bruker AXS
- <sup>5</sup> O. V. Dolomanov, L. J. Bourhis, R. J. Gildea, J. A. K. Howard, H. Puschmann, *J. Appl. Cryst.* 2009, **42**, 339-341.
- <sup>6</sup> C. B. Huebschle, G. M. Sheldrick, B. Dittrich, *J. Appl. Cryst.* 2011, **44**, 1281-1284.
- <sup>7</sup> G. M. Sheldrick, 1996. SHELXS. University of Göttingen, Germany.
- <sup>8</sup> G. M. Sheldrick, 1996. SHELXL. University of Göttingen, Germany.
